# Supplementary material
Source: PubMed Central journal article supplement (PMC2494808)
Supplement: 00152.2008_2.pdf [file 00152.2008_2.pdf]

## Supplementary References

1. Rademacher DJ, Patel S, Hopp FA, Dean C, Hillard CJ, Seagard JL. Microinjection of a cannabinoid receptor antagonist into the NTS increases baroreflex duration in dogs. *Am J Physiol Heart Circ Physiol*. May 2003;284(5):H1570-1576.
2. Seagard JL, Hopp FA, Hillard CJ, Dean C. Effects of endocannabinoids on discharge of baroreceptive NTS neurons. *Neurosci Lett*. Jun 24 2005;381(3):334-339.
3. Brozoski DT, Dean C, Hopp FA, Seagard JL. Uptake blockade of endocannabinoids in the NTS modulates baroreflex-evoked sympathoinhibition. *Brain Res*. Oct 19 2005;1059(2):197-202.
4. Garcia DE, Brown S, Hille B, Mackie K. Protein kinase C disrupts cannabinoid actions by phosphorylation of the CB1 cannabinoid receptor. *J Neurosci*. Apr 15 1998;18(8):2834-2841.
5. Endoh T. Pharmacological characterization of inhibitory effects of postsynaptic opioid and cannabinoid receptors on calcium currents in neonatal rat nucleus tractus solitarius. *Br J Pharmacol*. Feb 2006;147(4):391-401.
6. Merahi N, Laguzzi R. Cardiovascular effects of 5HT2 and 5HT3 receptor stimulation in the nucleus tractus solitarius of spontaneously hypertensive rats. *Brain Res*. Jan 9 1995;669(1):130-134.
7. Raul L. Serotonin2 receptors in the nucleus tractus solitarius: characterization and role in the baroreceptor reflex arc. *Cell Mol Neurobiol*. Oct 2003;23(4-5):709-726.
8. Pandey SC, Piano MR, Schwertz DW, Davis JM, Pandey GN. Effect of ethanol administration and withdrawal on serotonin receptor subtypes and receptor-mediated phosphoinositide hydrolysis in rat brain. *Alcohol Clin Exp Res*. Dec 1992;16(6):1110-1116.
9. Weng W, Reynolds IJ, Jani JP, et al. Desensitization of 5HT2 receptors by protein kinase C activation in distal pulmonary vascular smooth muscle cells in culture. *Microcirculation*. Jul 1994;1(2):129-135.
10. Cowan AR, Dean C, Bago M, Seagard JL. Potentiation of non-N-methyl-D-aspartate receptor-induced changes in blood pressure by substance P in rats. *Neurosci Lett*. Jan 14 2000;278(3):161-164.
11. Shank SS, Scheuer DA. Glucocorticoids reduce responses to AMPA receptor activation and blockade in nucleus tractus solitarius. *Am J Physiol Heart Circ Physiol*. May 2003;284(5):H1751-1761.
12. Talman WT. Glutamatergic transmission in the nucleus tractus solitarii: from server to peripherals in the cardiovascular information superhighway. *Braz J Med Biol Res*. Jan 1997;30(1):1-7.
13. Cid ME, Ortega A. Glutamate stimulates [3H]phorbol 12,13-dibutyrate binding in cultured Bergmann glia cells. *Eur J Pharmacol*. Mar 15 1993;245(1):51-54.
14. Lopez-Bayghen E, Espinoza-Rojo M, Ortega A. Glutamate down-regulates GLAST expression through AMPA receptors in Bergmann glial cells. *Brain Res Mol Brain Res*. Jul 4 2003;115(1):1-9.

15. Lopez-Bayghen E, Ortega A. Glutamate-dependent transcriptional regulation of GLAST: role of PKC. *J Neurochem.* Oct 2004;91(1):200-209.
16. Perkinton MS, Sihra TS, Williams RJ. Ca<sup>2+</sup>-permeable AMPA receptors induce phosphorylation of cAMP response element-binding protein through a phosphatidylinositol 3-kinase-dependent stimulation of the mitogen-activated protein kinase signaling cascade in neurons. *J Neurosci.* Jul 15 1999;19(14):5861-5874.
17. Saleh MC, Connell BJ, Saleh TM. Medullary and intrathecal injections of 17beta-estradiol in male rats. *Brain Res.* Jun 9 2000;867(1-2):200-209.
18. Saleh MC, Connell BJ, Saleh TM. Autonomic and cardiovascular reflex responses to central estrogen injection in ovariectomized female rats. *Brain Res.* Oct 6 2000;879(1-2):105-114.
19. Vasudevan N, Kow LM, Pfaff D. Integration of steroid hormone initiated membrane action to genomic function in the brain. *Steroids.* May-Jun 2005;70(5-7):388-396.
20. Mannella P, Brinton RD. Estrogen receptor protein interaction with phosphatidylinositol 3-kinase leads to activation of phosphorylated Akt and extracellular signal-regulated kinase 1/2 in the same population of cortical neurons: a unified mechanism of estrogen action. *J Neurosci.* Sep 13 2006;26(37):9439-9447.
21. Wu TW, Wang JM, Chen S, Brinton RD. 17Beta-estradiol induced Ca<sup>2+</sup> influx via L-type calcium channels activates the Src/ERK/cyclic-AMP response element binding protein signal pathway and BCL-2 expression in rat hippocampal neurons: a potential initiation mechanism for estrogen-induced neuroprotection. *Neuroscience.* 2005;135(1):59-72.
22. Lee DY, Chai YG, Lee EB, et al. 17Beta-estradiol inhibits high-voltage-activated calcium channel currents in rat sensory neurons via a non-genomic mechanism. *Life Sci.* Mar 15 2002;70(17):2047-2059.
23. Kelly MJ, Qiu J, Wagner EJ, Ronnekleiv OK. Rapid effects of estrogen on G protein-coupled receptor activation of potassium channels in the central nervous system (CNS). *J Steroid Biochem Mol Biol.* Dec 2002;83(1-5):187-193.
24. Bonagamba LG, Sevoz-Couche C, N'Diaye A, et al. Bradycardic responses to microinjection of N-methyl-D-aspartate into the nucleus tractus solitarius are inhibited by local activation of 5-HT<sub>3</sub> receptors. *Neuropharmacology.* Sep 2000;39(12):2336-2345.
25. Takemoto Y. Depressor and bradycardic actions of L-proline injected into the nucleus tractus solitarii of anesthetized rats. *Jpn J Physiol.* Dec 2001;51(6):687-692.
26. Perkinton MS, Ip JK, Wood GL, Crossthwaite AJ, Williams RJ. Phosphatidylinositol 3-kinase is a central mediator of NMDA receptor signalling to MAP kinase (Erk1/2), Akt/PKB and CREB in striatal neurones. *J Neurochem.* Jan 2002;80(2):239-254.
27. Kubo T, Kihara M. Blood pressure modulation by substance P in the rat nucleus tractus solitarius. *Brain Res.* Jun 16 1987;413(2):379-383.

28. Seagard JL, Dean C, Hopp FA. Modulation of the carotid baroreceptor reflex by substance P in the nucleus tractus solitarius. *J Auton Nerv Syst.* Jan 14 2000;78(2-3):77-85.
29. Endoh T. Dual effects of neurokinin on calcium channel currents and signal pathways in neonatal rat nucleus tractus solitarius. *Brain Res.* Sep 19 2006;1110(1):116-127.
30. Yamada T, Endoh T, Suzuki T. Inhibition of calcium channels by neurokinin receptor and signal transduction in hamster submandibular ganglion cells. *J Auton Nerv Syst.* Apr 16 1999;76(1):1-8.
31. Foley CM, Vogl HW, Mueller PJ, Hay M, Hasser EM. Cardiovascular response to group I metabotropic glutamate receptor activation in NTS. *Am J Physiol.* May 1999;276(5 Pt 2):R1469-1478.
32. Endoh T. Characterization of modulatory effects of postsynaptic metabotropic glutamate receptors on calcium currents in rat nucleus tractus solitarius. *Brain Res.* Oct 22 2004;1024(1-2):212-224.
33. Karim F, Wang CC, Gereau RWt. Metabotropic glutamate receptor subtypes 1 and 5 are activators of extracellular signal-regulated kinase signaling required for inflammatory pain in mice. *J Neurosci.* Jun 1 2001;21(11):3771-3779.
34. Barraco RA, O'Leary DS, Ergene E, Scislo TJ. Activation of purinergic receptor subtypes in the nucleus tractus solitarius elicits specific regional vascular response patterns. *J Auton Nerv Syst.* Jul 5 1996;59(3):113-124.
35. Scislo TJ, Ergene E, O'Leary DS. Impaired arterial baroreflex regulation of heart rate after blockade of P2-purinoceptors in the nucleus tractus solitarius. *Brain Res Bull.* Sep 1 1998;47(1):63-67.
36. Gurtu S, Sinha JN, Bhargava KP. Involvement of alpha2-adrenoceptors of nucleus tractus solitarius in baroreflex mediated bradycardia. *Naunyn Schmiedebergs Arch Pharmacol.* Oct 1982;321(1):38-43.
37. Hasser EM, Bishop VS. Role of alpha-adrenergic mechanisms on responses to area postrema stimulation and circulating vasopressin. *Am J Physiol.* Aug 1993;265(2 Pt 2):H530-536.
38. Hasser EM, Bishop VS, Hay M. Interactions between vasopressin and baroreflex control of the sympathetic nervous system. *Clin Exp Pharmacol Physiol.* Jan 1997;24(1):102-108.
39. Zhang J, Abdel-Rahman AA. Mitogen-activated protein kinase phosphorylation in the rostral ventrolateral medulla plays a key role in imidazoline (i1)-receptor-mediated hypotension. *J Pharmacol Exp Ther.* Sep 2005;314(3):945-952.
40. Karkoulas G, Mastrogianni O, Lymperopoulos A, Paris H, Flordellis C. alpha(2)-Adrenergic receptors activate MAPK and Akt through a pathway involving arachidonic acid metabolism by cytochrome P450-dependent epoxygenase, matrix metalloproteinase activation and subtype-specific transactivation of EGFR. *Cell Signal.* May 2006;18(5):729-739.
41. Xu H, Hu SJ, Han Y, Long KP. [Protein kinase a mediated excitatory adrenergic effect on chronically compressed dorsal root ganglion neurons in rats]. *Sheng Li Xue Bao.* Dec 1999;51(6):615-622.
42. Adamson P, Xiang JZ, Mantzourides T, Brammer MJ, Campbell IC. Presynaptic alpha 2-adrenoceptor and kappa-opiate receptor occupancy promotes closure of

- neuronal (N-type) calcium channels. *Eur J Pharmacol*. Dec 12 1989;174(1):63-70.
43. Kolaj M, Renaud LP. Norepinephrine acts via alpha(2) adrenergic receptors to suppress N-type calcium channels in dissociated rat median preoptic nucleus neurons. *Neuropharmacology*. Sep 2001;41(4):472-479.
  44. Li YW, Bayliss DA. Activation of alpha 2-adrenoceptors causes inhibition of calcium channels but does not modulate inwardly-rectifying K<sup>+</sup> channels in caudal raphe neurons. *Neuroscience*. Feb 1998;82(3):753-765.
  45. Aoki Y, Yamada E, Endoh T, Suzuki T. Multiple actions of extracellular ATP and adenosine on calcium currents mediated by various purinoceptors in neurons of nucleus tractus solitarius. *Neurosci Res*. Nov 2004;50(3):245-255.
  46. Ermirio R, Ruggeri P, Cogo CE, Molinari C, Calaresu FR. Neuronal and cardiovascular responses to ANF microinjected into the solitary nucleus. *Am J Physiol*. Feb 1989;256(2 Pt 2):R577-582.
  47. Rodriguez Fermepin M, Alvarez Maubecin V, Zarrabeitia V, Bianciotti LG, Vatta MS, Fernandez BE. Atrial natriuretic factor (ANF) effects on L-, N-, and P/Q-type voltage-operated calcium channels. *Cell Mol Neurobiol*. Dec 2002;22(5-6):771-781.
  48. Feldman PD, Parveen N, Sezen S. Cardiovascular effects of Leu-enkephalin in the nucleus tractus solitarius of the rat. *Brain Res*. Feb 19 1996;709(2):331-336.
  49. Narita M, Kuzumaki N, Miyatake M, et al. Role of delta-opioid receptor function in neurogenesis and neuroprotection. *J Neurochem*. Jun 2006;97(5):1494-1505.
  50. Chao D, Donnelly DF, Feng Y, Bazy-Asaad A, Xia Y. Cortical delta-opioid receptors potentiate K(+) homeostasis during anoxia and oxygen-glucose deprivation. *J Cereb Blood Flow Metab*. Jun 14 2006.
  51. Huang HN, Lu PJ, Lo WC, Lin CH, Hsiao M, Tseng CJ. In situ Akt phosphorylation in the nucleus tractus solitarii is involved in central control of blood pressure and heart rate. *Circulation*. Oct 19 2004;110(16):2476-2483.
  52. Heidenreich KA. Insulin and IGF-I receptor signaling in cultured neurons. *Ann N Y Acad Sci*. Aug 27 1993;692:72-88.
  53. Subramaniam S, Shahani N, Strelau J, et al. Insulin-like growth factor 1 inhibits extracellular signal-regulated kinase to promote neuronal survival via the phosphatidylinositol 3-kinase/protein kinase A/c-Raf pathway. *J Neurosci*. Mar 16 2005;25(11):2838-2852.
  54. Blair LA, Marshall J. IGF-1 modulates N and L calcium channels in a PI 3-kinase-dependent manner. *Neuron*. Aug 1997;19(2):421-429.
  55. Grundemar L, Wahlestedt C, Reis DJ. Neuropeptide Y acts at an atypical receptor to evoke cardiovascular depression and to inhibit glutamate responsiveness in the brainstem. *J Pharmacol Exp Ther*. Aug 1991;258(2):633-638.
  56. Yang SN, Narvaez JA, Bjelke B, Agnati LF, Fuxe K. Microinjections of subpicomolar amounts of NPY(13-36) into the nucleus tractus solitarius of the rat counteract the vasodepressor responses of NPY(1-36) and of a NPY Y1 receptor agonist. *Brain Res*. Sep 3 1993;621(1):126-132.
  57. Morris MJ, Pavia JM. Lack of effect of age on the cardiovascular response to neuropeptide Y injection in the rat nucleus tractus solitarius. *Clin Exp Pharmacol Physiol*. Feb 1997;24(2):162-165.

58. Ouyang M, Wang S. Dexamethasone attenuates the depressor response induced by neuropeptide Y microinjected into the nucleus tractus solitarius in rats. *Br J Pharmacol*. Mar 2000;129(5):865-870.
59. Hansel DE, Eipper BA, Ronnett GV. Neuropeptide Y functions as a neuroproliferative factor. *Nature*. Apr 19 2001;410(6831):940-944.
60. Silva AP, Carvalho AP, Carvalho CM, Malva JO. Functional interaction between neuropeptide Y receptors and modulation of calcium channels in the rat hippocampus. *Neuropharmacology*. Feb 2003;44(2):282-292.
61. Acuna-Goycolea C, Tamamaki N, Yanagawa Y, Obata K, van den Pol AN. Mechanisms of neuropeptide Y, peptide YY, and pancreatic polypeptide inhibition of identified green fluorescent protein-expressing GABA neurons in the hypothalamic neuroendocrine arcuate nucleus. *J Neurosci*. Aug 10 2005;25(32):7406-7419.
62. Hashim MA, Tadepalli AS. Hemodynamic responses evoked by endothelin from central cardiovascular neural substrates. *Am J Physiol*. Jan 1992;262(1 Pt 2):H1-9.
63. Dai SM, Shan ZZ, Miao CY, Yin M, Su DF. Hemodynamic responses to endothelin-1 and endothelin antagonists microinjected into the nucleus tractus solitarius in rats. *J Cardiovasc Pharmacol*. Oct 1997;30(4):475-480.
64. Ieda M, Fukuda K, Hisaka Y, et al. Endothelin-1 regulates cardiac sympathetic innervation in the rodent heart by controlling nerve growth factor expression. *J Clin Invest*. Mar 2004;113(6):876-884.
65. Held B, Pocock JM, Pearson HA. Endothelin-1 inhibits voltage-sensitive Ca<sup>2+</sup> channels in cultured rat cerebellar granule neurones via the ET-A receptor. *Pflugers Arch*. Oct 1998;436(5):766-775.
66. Nosjean A, Franc B, Laguzzi R. Increased sympathetic nerve discharge without alteration in the sympathetic baroreflex response by serotonin<sub>3</sub> receptor stimulation in the nucleus tractus solitarius of the rat. *Neurosci Lett*. Feb 15 1995;186(1):41-44.
67. Sevoz C, Nosjean A, Callera JC, Machado B, Hamon M, Laguzzi R. Stimulation of 5-HT<sub>3</sub> receptors in the NTS inhibits the cardiac Bezold-Jarisch reflex response. *Am J Physiol*. Jul 1996;271(1 Pt 2):H80-87.
68. Callera JC, Sevoz C, Laguzzi R, Machado BH. Microinjection of a serotonin<sub>3</sub> receptor agonist into the NTS of unanesthetized rats inhibits the bradycardia evoked by activation of the baro- and chemoreflexes. *J Auton Nerv Syst*. Apr 14 1997;63(3):127-136.
69. Comet MA, Sevoz-Couche C, Hanoun N, Hamon M, Laguzzi R. 5-HT-mediated inhibition of cardiovascular baroreceptor reflex response during defense reaction in the rat. *Am J Physiol Heart Circ Physiol*. Oct 2004;287(4):H1641-1649.
70. Comet MA, Laguzzi R, Hamon M, Sevoz-Couche C. Functional interaction between nucleus tractus solitarius NK1 and 5-HT<sub>3</sub> receptors in the inhibition of baroreflex in rats. *Cardiovasc Res*. Mar 1 2005;65(4):930-939.
71. Mao L, Wang JQ. Microinjection of nociceptin (Orphanin FQ) into nucleus tractus solitarius elevates blood pressure and heart rate in both anesthetized and conscious rats. *J Pharmacol Exp Ther*. Jul 2000;294(1):255-262.

72. Mao L, Wang JQ. Pharmacological activation of nociceptin receptors in the nucleus tractus solitarius inhibits baroreceptor reflex in pentobarbital-anesthetized rats. *Neuroscience*. 2000;101(2):435-440.
73. Pu L, Bao GB, Ma L, Pei G. Acute desensitization of nociceptin/orphanin FQ inhibition of voltage-gated calcium channels in freshly dissociated hippocampal neurons. *Eur J Neurosci*. Oct 1999;11(10):3610-3616.
74. Florentino A, Varga K, Kunos G. Mechanism of the cardiovascular effects of GABAB receptor activation in the nucleus tractus solitarius of the rat. *Brain Res*. Dec 10 1990;535(2):264-270.
75. Okada M, Bunag RD. Contrasting baroreflex effects of muscimol versus bicuculline injected into the nucleus tractus solitarius in anesthetized rats. *J Cardiovasc Pharmacol*. Sep 1995;26(3):363-371.
76. Borodinsky LN, O'Leary D, Neale JH, Vicini S, Coso OA, Fiszman ML. GABA-induced neurite outgrowth of cerebellar granule cells is mediated by GABA(A) receptor activation, calcium influx and CaMKII and erk1/2 pathways. *J Neurochem*. Mar 2003;84(6):1411-1420.
77. Fukura H, Komiya Y, Igarashi M. Signaling pathway downstream of GABAA receptor in the growth cone. *J Neurochem*. Oct 1996;67(4):1426-1434.
78. Kunos G, Varga K. The tachycardia associated with the defense reaction involves activation of both GABAA and GABAB receptors in the nucleus tractus solitarius. *Clin Exp Hypertens*. Jan-Feb 1995;17(1-2):91-100.
79. Tremblay E, Ben-Ari Y, Roisin MP. Different GABAB-mediated effects on protein kinase C activity and immunoreactivity in neonatal and adult rat hippocampal slices. *J Neurochem*. Aug 1995;65(2):863-870.
80. Ren X, Mody I. Gamma-hydroxybutyrate reduces mitogen-activated protein kinase phosphorylation via GABA B receptor activation in mouse frontal cortex and hippocampus. *J Biol Chem*. Oct 24 2003;278(43):42006-42011.
81. Sun BB, Chiu SY. N-type calcium channels and their regulation by GABAB receptors in axons of neonatal rat optic nerve. *J Neurosci*. Jul 1 1999;19(13):5185-5194.
82. Glaum SR, Brooks PA. Tetanus-induced sustained potentiation of monosynaptic inhibitory transmission in the rat medulla: evidence for a presynaptic locus. *J Neurophysiol*. Jul 1996;76(1):30-38.
83. Chen G, van den Pol AN. Presynaptic GABAB autoreceptor modulation of P/Q-type calcium channels and GABA release in rat suprachiasmatic nucleus neurons. *J Neurosci*. Mar 1 1998;18(5):1913-1922.
84. Han J, Kang D, Kim D. Properties and modulation of the G protein-coupled K<sup>+</sup> channel in rat cerebellar granule neurons: ATP versus phosphatidylinositol 4,5-bisphosphate. *J Physiol*. Aug 1 2003;550(Pt 3):693-706.
85. Hassen AH, Feuerstein G. mu-Opioid receptors in NTS elicit pressor responses via sympathetic pathways. *Am J Physiol*. Jan 1987;252(1 Pt 2):H156-162.
86. Casto R, Phillips MI. Angiotensin II attenuates baroreflexes at nucleus tractus solitarius of rats. *Am J Physiol*. Feb 1986;250(2 Pt 2):R193-198.
87. Yamada E, Endoh T, Suzuki T. Angiotensin II-induced inhibition of calcium currents via G(q/11)-protein involving protein kinase C in hamster submandibular ganglion neurons. *Neurosci Res*. Jun 2002;43(2):179-189.

88. Endoh T. Involvement of Src tyrosine kinase and mitogen-activated protein kinase in the facilitation of calcium channels in rat nucleus of the tractus solitarius by angiotensin II. *J Physiol*. Nov 1 2005;568(Pt 3):851-865.
89. Wong LF, Polson JW, Murphy D, Paton JF, Kasparov S. Genetic and pharmacological dissection of pathways involved in the angiotensin II-mediated depression of baroreflex function. *Faseb J*. Oct 2002;16(12):1595-1601.
90. Veerasingham SJ, Raizada MK. Brain renin-angiotensin system dysfunction in hypertension: recent advances and perspectives. *Br J Pharmacol*. May 2003;139(2):191-202.
91. Endoh T, Abe M, Suzuki T. Cyclic AMP-dependent protein kinase-independent angiotensin II-induced inhibition of calcium current in hamster submandibular ganglion neurons. *Bull Tokyo Dent Coll*. May 2002;43(2):95-99.
92. Xu Y, Krukoff TL. Adrenomedullin in the rostral ventrolateral medulla inhibits baroreflex control of heart rate: a role for protein kinase A. *Br J Pharmacol*. May 2006;148(1):70-77.
93. Xu Y, Krukoff TL. Adrenomedullin stimulates nitric oxide release from SK-N-SH human neuroblastoma cells by modulating intracellular calcium mobilization. *Endocrinology*. May 2005;146(5):2295-2305.
94. Parameswaran N, Hall CS, McCabe LR, Spielman WS. Adrenomedullin increases AP-1 expression in rat mesangial cells via activation of protein kinase-A and p38 MAPK. *Cell Physiol Biochem*. 2003;13(6):367-374.
95. Okumura H, Nagaya N, Itoh T, et al. Adrenomedullin infusion attenuates myocardial ischemia/reperfusion injury through the phosphatidylinositol 3-kinase/Akt-dependent pathway. *Circulation*. Jan 20 2004;109(2):242-248.
96. Hegarty AA, Felder RB. Antagonism of vasopressin V1 receptors in NTS attenuates baroreflex control of renal nerve activity. *Am J Physiol*. Sep 1995;269(3 Pt 2):H1080-1086.
97. Sabatier N, Shibuya I, Dayanithi G. Intracellular calcium increase and somatodendritic vasopressin release by vasopressin receptor agonists in the rat supraoptic nucleus: involvement of multiple intracellular transduction signals. *J Neuroendocrinol*. Mar 2004;16(3):221-236.
98. Sabatier N, Richard P, Dayanithi G. L-, N- and T- but neither P- nor Q-type Ca<sup>2+</sup> channels control vasopressin-induced Ca<sup>2+</sup> influx in magnocellular vasopressin neurones isolated from the rat supraoptic nucleus. *J Physiol*. Sep 1 1997;503 ( Pt 2):253-268.
99. Son MC, Brinton RD. Regulation and mechanism of L-type calcium channel activation via V1a vasopressin receptor activation in cultured cortical neurons. *Neurobiol Learn Mem*. Nov 2001;76(3):388-402.
100. Narvaez JA, Aguirre JA, Fuxe K. Subpicomolar amounts of NPY(13-36) injected into the nucleus tractus solitarius of the rat counteract the cardiovascular responses to L-glutamate. *Neurosci Lett*. Mar 19 1993;151(2):182-186.
101. Gurtu S, Sharma DK, Pant KK, Sinha JN, Bhargava KP. Role of medullary cholinergic receptors in baroreflex bradycardia. *Clin Exp Hypertens A*. 1986;8(6):1063-1079.
102. Fisher LA. Central autonomic modulation of cardiac baroreflex by corticotropin-releasing factor. *Am J Physiol*. Apr 1989;256(4 Pt 2):H949-955.

103. Fisher LA. Corticotropin-releasing factor: central nervous system effects on baroreflex control of heart rate. *Life Sci.* 1988;42(25):2645-2649.
104. Canesin RO, Bonagamba LG, Machado BH. Bradycardic and hypotensive responses to microinjection of L-glutamate into the lateral aspect of the commissural NTS are blocked by an NMDA receptor antagonist. *Brain Res.* Jan 3 2000;852(1):68-75.
105. Kubo T, Kihara M. Unilateral blockade of excitatory amino acid receptors in the nucleus tractus solitarius produces an inhibition of baroreflexes in rats. *Naunyn Schmiedebergs Arch Pharmacol.* Mar 1991;343(3):317-322.
106. Tian B, Hartle DK. Cardiovascular effects of NMDA and MK-801 infusion at area postrema and mNTS in rat. *Pharmacol Biochem Behav.* Nov 1994;49(3):489-495.
107. de Oliveira CV, Rosas-Arellano MP, Solano-Flores LP, Ciriello J. Cardiovascular effects of hypocretin-1 in nucleus of the solitary tract. *Am J Physiol Heart Circ Physiol.* Apr 2003;284(4):H1369-1377.
108. Diaz Z, Narvaez JA, Hedlund PB, Aguirre JA, Gonzalez-Baron S, Fuxe K. Centrally infused galanin-(1-15) but not galanin-(1-29) reduces the baroreceptor reflex sensitivity in the rat. *Brain Res.* Nov 25 1996;741(1-2):32-37.
109. Charles J, Angus JA, Wright CE. Central endogenous histamine modulates sympathetic outflow through H3 receptors in the conscious rabbit. *Br J Pharmacol.* Jul 2003;139(5):1023-1031.



# 60 minutes

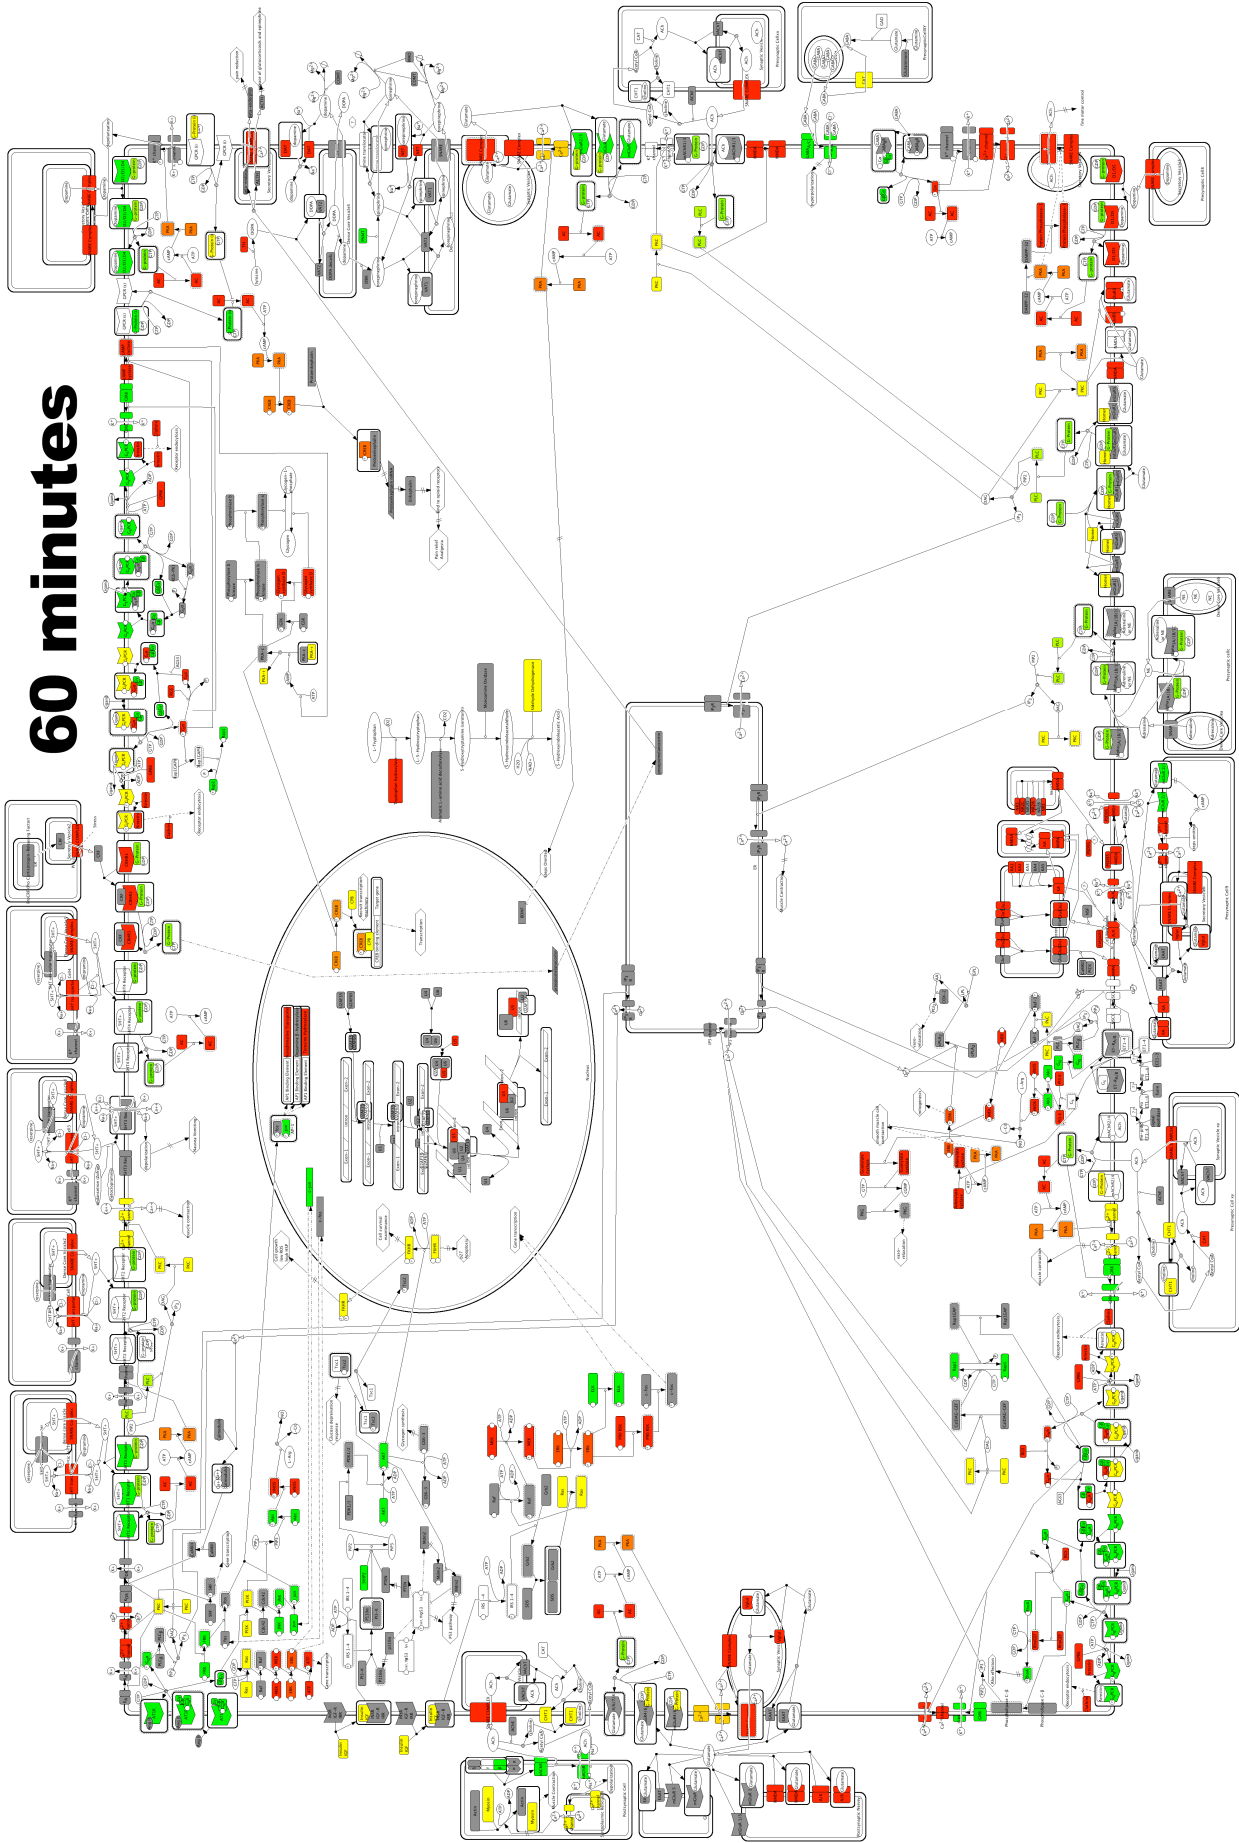

# 75 minutes

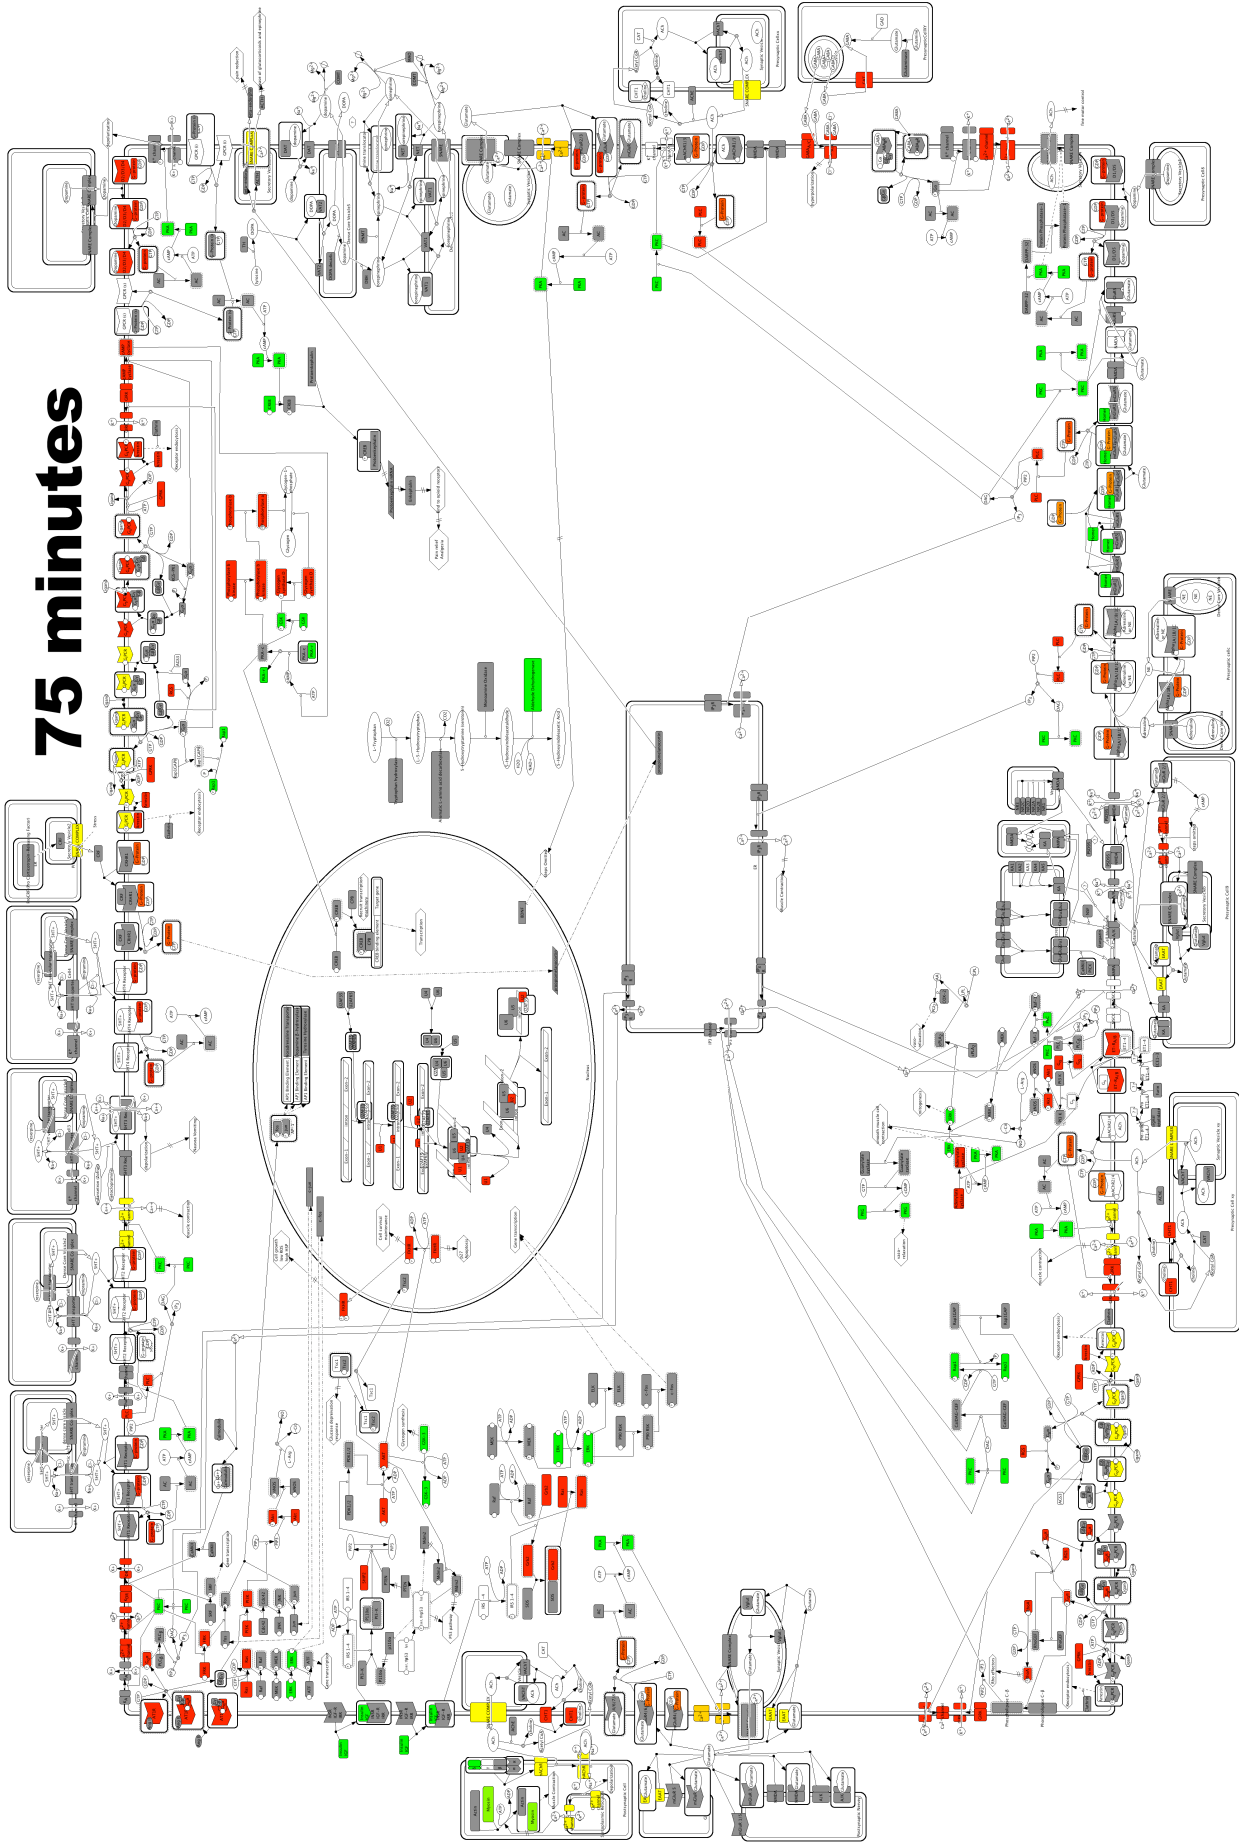

# 90 minutes

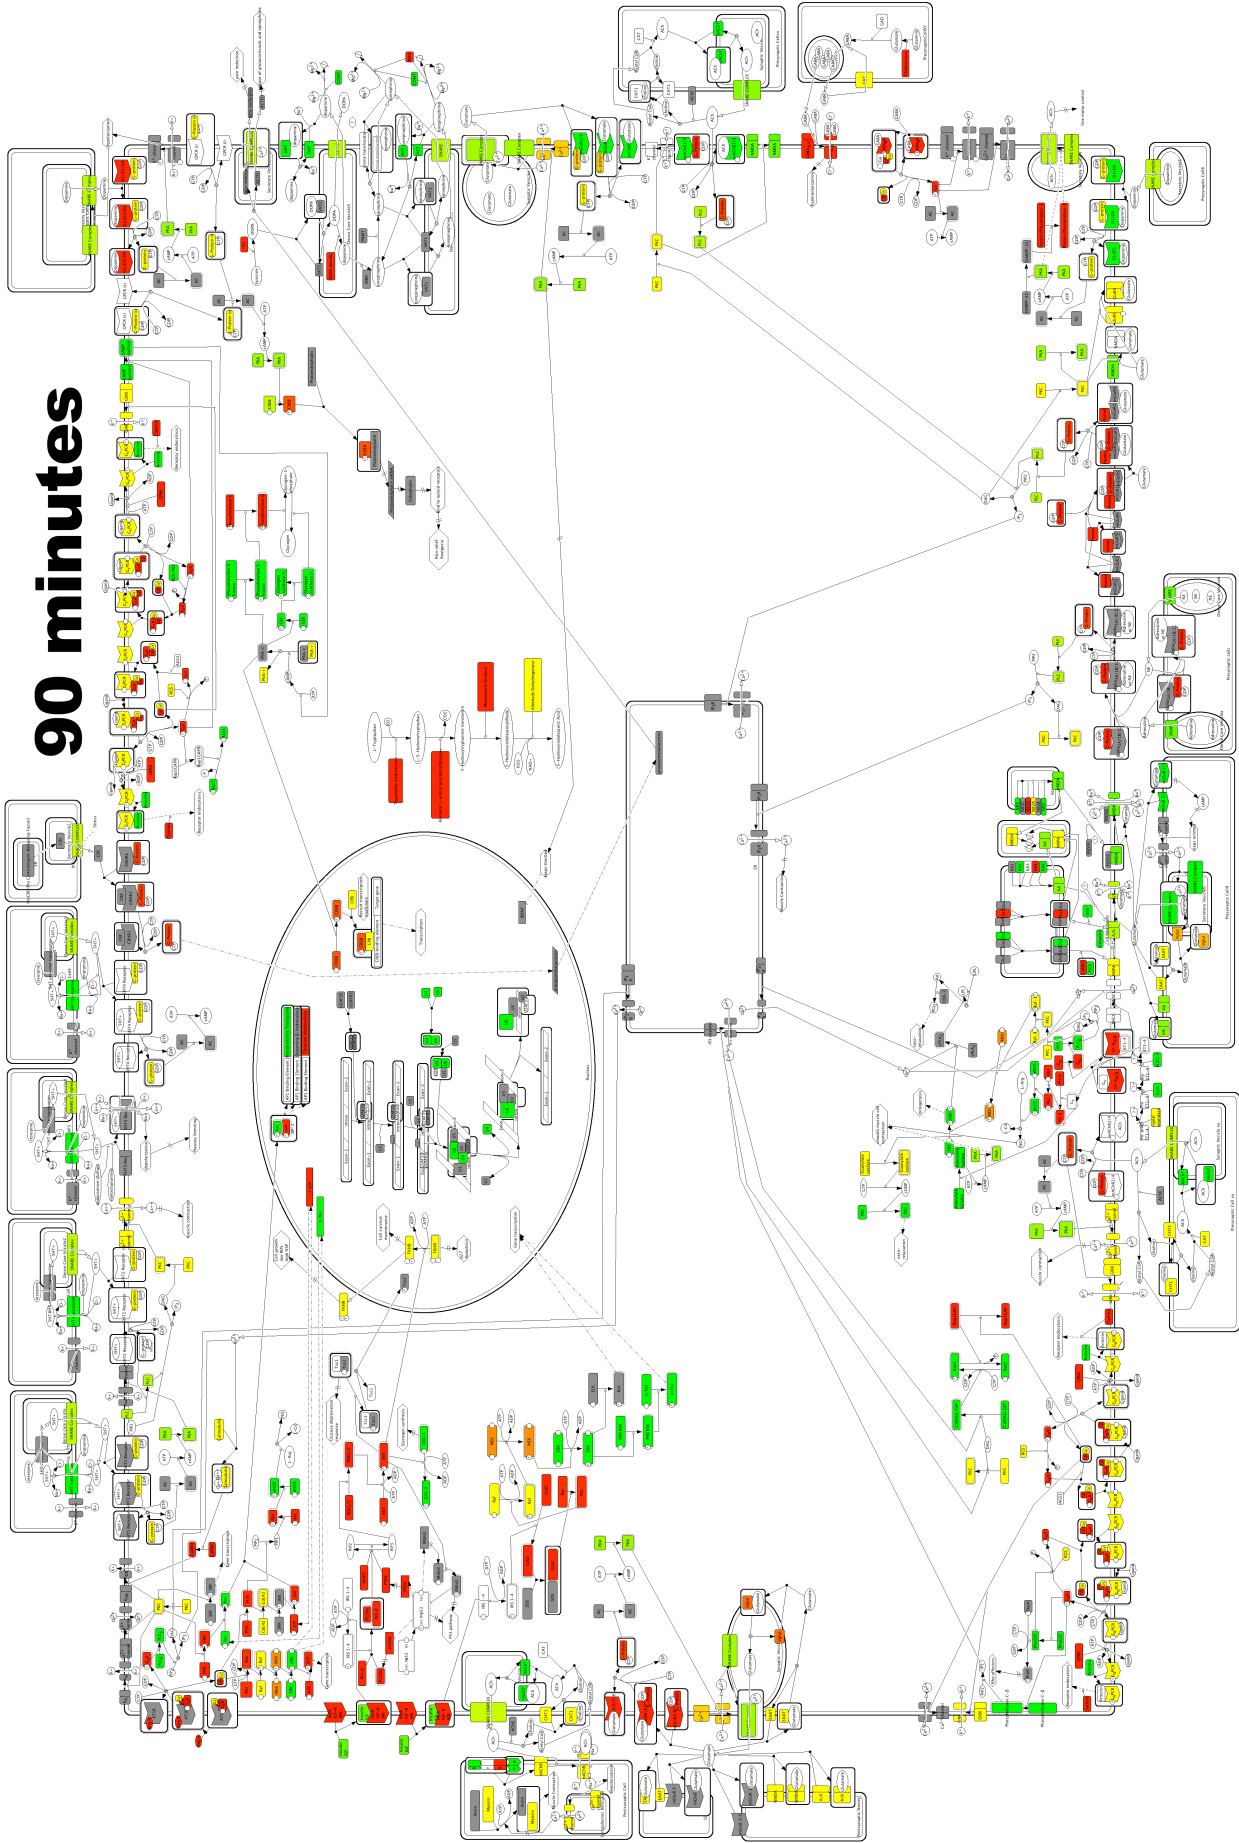

# 105 minutes

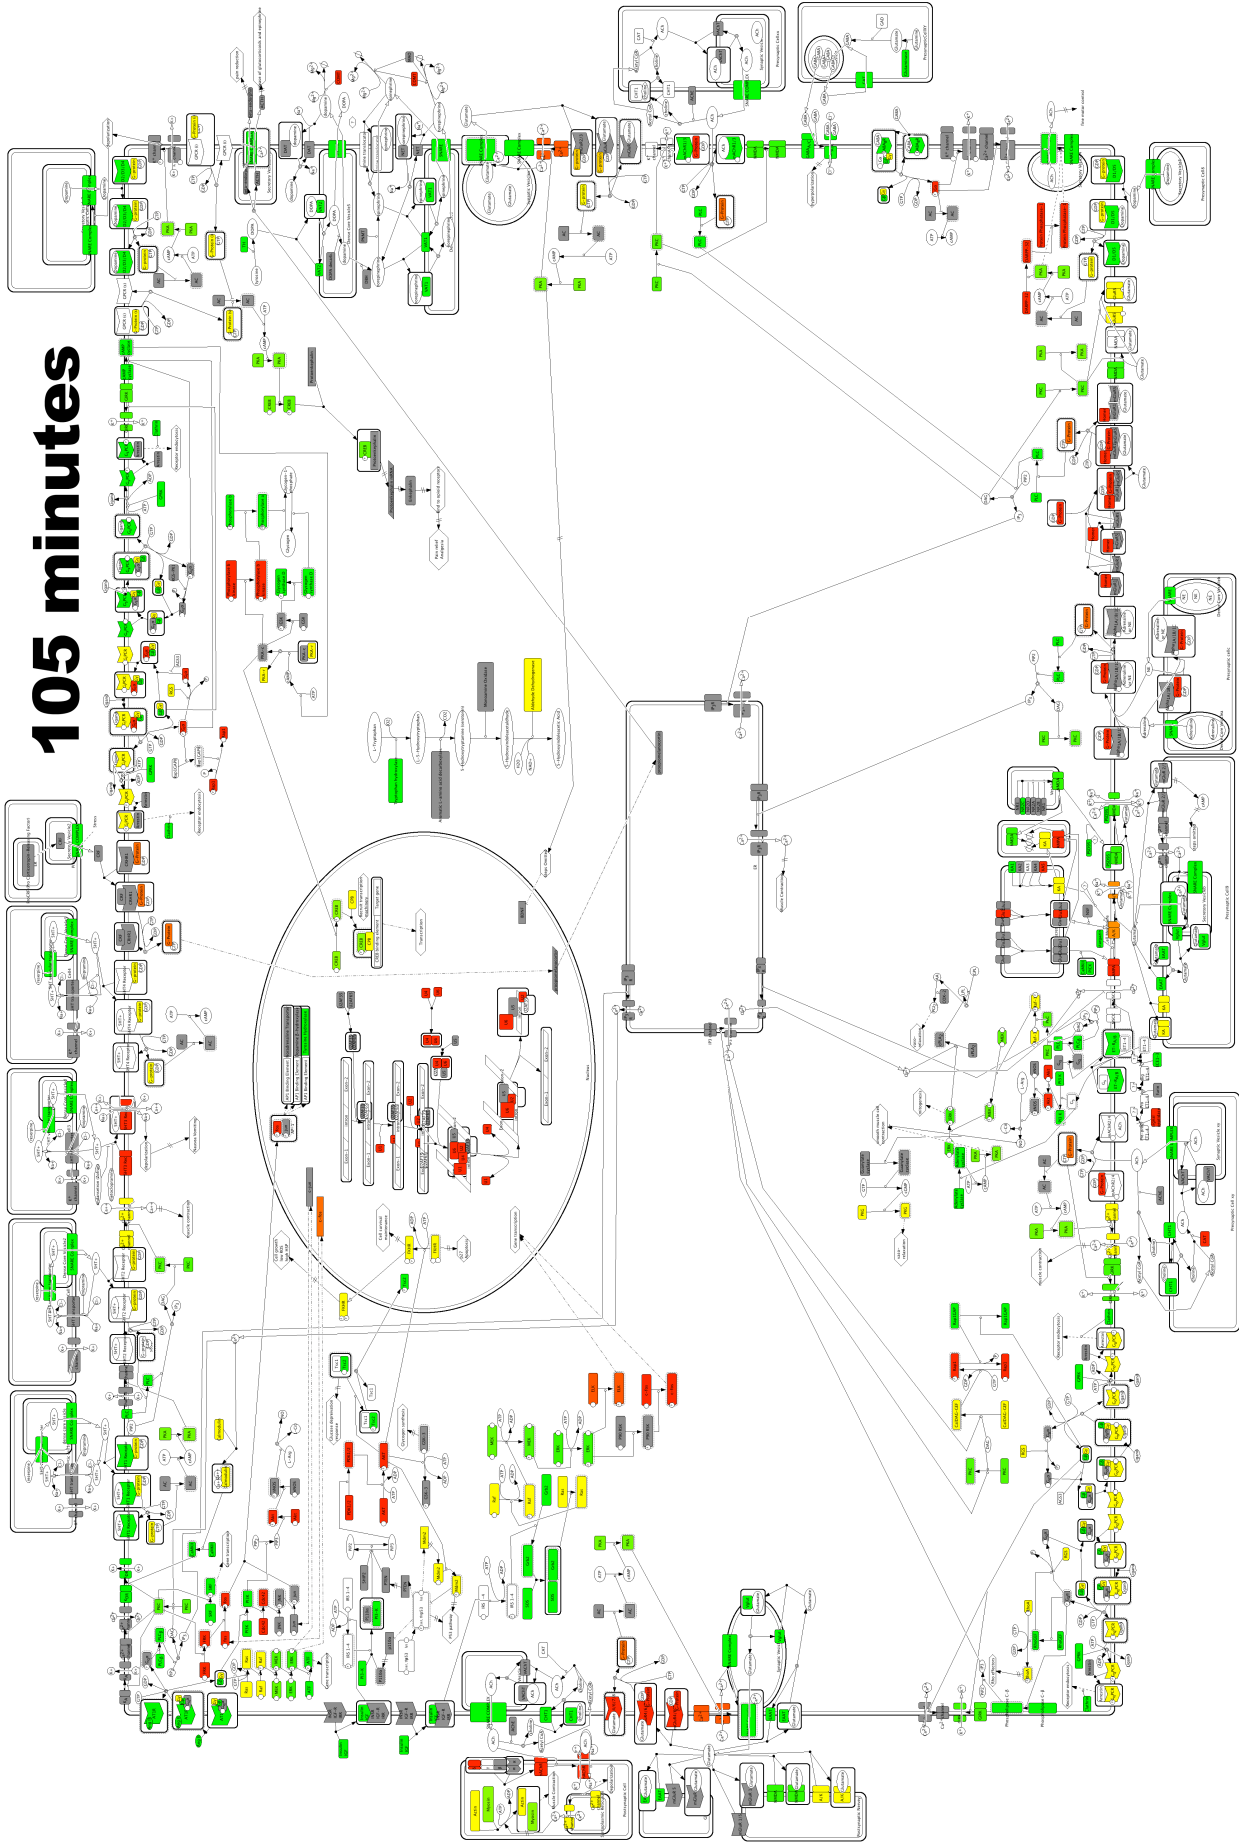

# 120 minutes

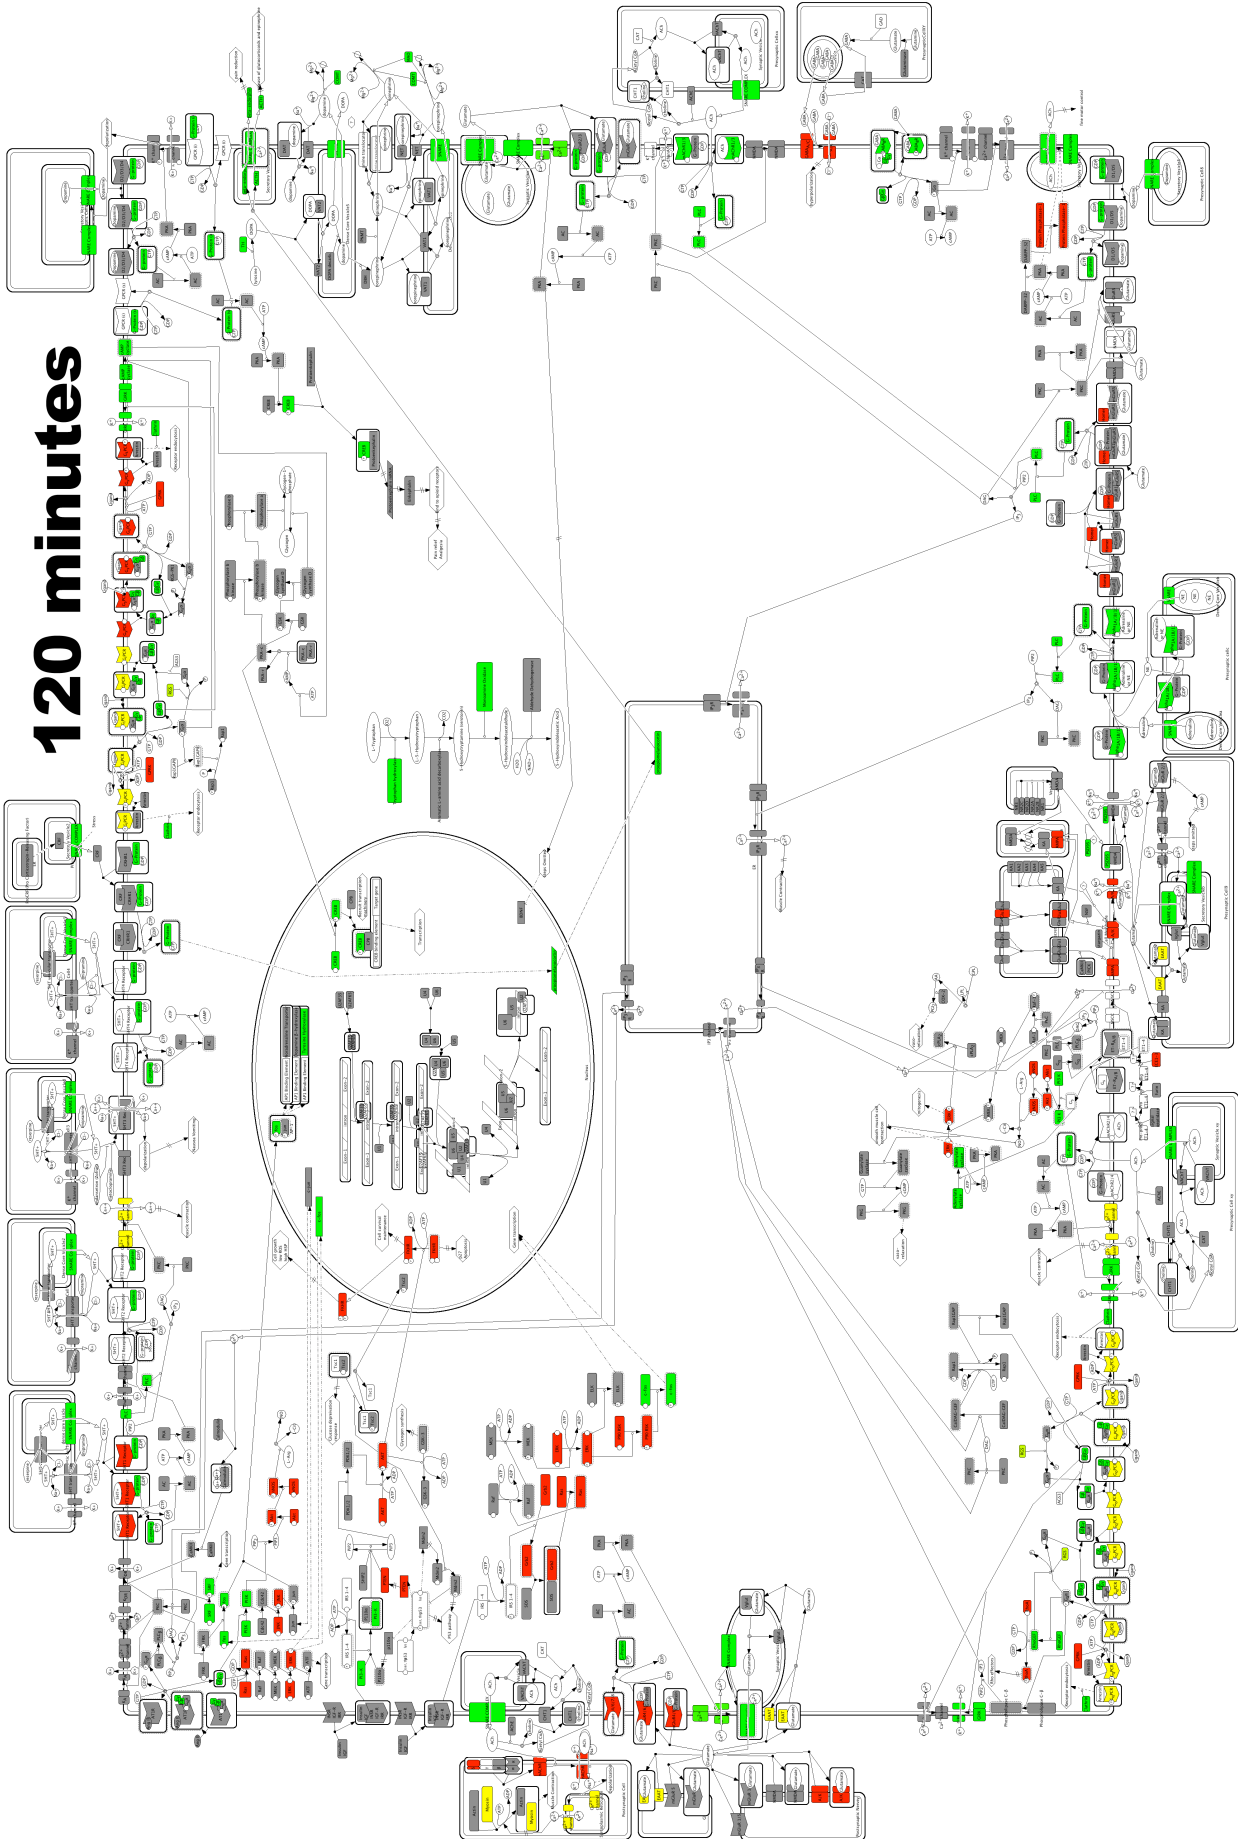



**Table 1 - Differentially Expressed Receptor List**

| 60    | 75    | 105   | 90    | 120   | Gene Name                                                             |
|-------|-------|-------|-------|-------|-----------------------------------------------------------------------|
| -0.17 |       |       | -0.24 |       | 5-hydroxytryptamine (serotonin) receptor 1A                           |
|       |       |       | -0.34 | 0.41  | 5-hydroxytryptamine (serotonin) receptor 1D                           |
|       |       |       | 0.27  |       | 5-hydroxytryptamine (serotonin) receptor 3b                           |
|       |       | -0.28 |       |       | 5-hydroxytryptamine (serotonin) receptor 7                            |
|       | -0.25 |       | 0.20  |       | Activin A receptor type II-like 1                                     |
| 0.32  |       |       |       |       | Activin receptor IIB                                                  |
|       | -0.21 | -0.21 |       |       | Adenosine A2B receptor                                                |
|       | -0.21 | -0.16 | 0.37  |       | Adenylate cyclase activating polypeptide 1 receptor 1                 |
|       |       |       |       | -0.33 | Adrenergic receptor, alpha 1b                                         |
|       | 0.29  |       | -0.32 |       | Adrenergic receptor, alpha 2c                                         |
|       |       | 0.36  | -0.67 |       | Adrenergic receptor, beta 2                                           |
|       |       | -0.62 |       |       | Adrenomedullin receptor                                               |
| -0.22 | -0.34 | -0.20 |       |       | Advanced glycosylation end product-specific receptor                  |
|       | 0.36  |       | -0.45 |       | Angiotensin II receptor, type 1 (AT1A)                                |
| -0.15 |       |       |       |       | Angiotensin receptor-like 1                                           |
|       |       |       | -0.28 | -0.29 | Arginine vasopressin receptor 1A                                      |
|       |       | -0.33 | 1.15  |       | Aryl hydrocarbon receptor                                             |
|       |       | 0.64  | 0.34  |       | Aryl hydrocarbon receptor nuclear translocator                        |
|       |       |       | 0.52  |       | Aryl hydrocarbon receptor nuclear translocator-like                   |
|       |       |       | -0.29 |       | Asialoglycoprotein receptor 2                                         |
|       |       | 0.32  |       |       | Benzodiazepine receptor, peripheral                                   |
|       |       | 0.31  |       | 0.34  | Cadherin EGF LAG seven-pass G-type receptor 2                         |
| 0.45  |       |       |       |       | Calcitonin gene-related peptide-receptor component protein            |
| 0.51  |       | -0.32 | 0.35  |       | Calcitonin receptor-like                                              |
|       |       |       | 0.31  |       | Calcium-independent alpha-latrotoxin receptor homolog 3               |
| -0.39 |       | -0.26 |       |       | Calcium-sensing receptor                                              |
|       |       | 0.67  |       |       | Cannabinoid receptor 1 (brain)                                        |
|       |       | -0.38 |       |       | Chemokine (C-X-C motif) receptor 3                                    |
|       |       | -0.31 |       |       | Chemokine (C-X-C motif) receptor 4                                    |
|       |       | 0.12  | -0.11 |       | Chemokine orphan receptor 1                                           |
|       |       | -0.33 | -0.49 | -0.50 | Cholinergic receptor, muscarinic 3                                    |
|       |       | -0.24 |       |       | Cholinergic receptor, nicotinic, alpha polypeptide 4                  |
| -0.24 |       | 0.27  |       |       | Cholinergic receptor, nicotinic, beta polypeptide 1 (muscle)          |
|       |       | -0.31 |       |       | Cholinergic receptor, nicotinic, beta polypeptide 3                   |
|       | -0.23 | -0.17 | 0.17  | 0.18  | Cholinergic receptor, nicotinic, delta polypeptide                    |
|       | 0.29  |       |       |       | Cholinergic receptor, nicotinic, epsilon polypeptide                  |
|       |       | 0.19  |       |       | Colony stimulating factor 1 receptor                                  |
|       |       | 0.40  |       |       | Colony stimulating factor 1 receptor                                  |
|       |       | -0.37 |       |       | Complement component 3a receptor 1                                    |
| -0.30 |       |       | 0.21  | 0.20  | Complement component 5, receptor 1                                    |
|       | -0.50 | -0.26 |       |       | Complement receptor 2 (predicted)                                     |
| 0.25  |       |       |       |       | Corticotropin releasing hormone receptor 1                            |
|       |       |       | -0.60 |       | Coxsackie virus and adenovirus receptor                               |
|       |       | 0.47  | 0.40  | 0.41  | Coxsackie virus and adenovirus receptor-like 1                        |
| 0.24  |       | -0.23 |       | -0.23 | Diphtheria toxin receptor                                             |
|       |       | -0.21 | -0.34 |       | Discoidin domain receptor family, member 1                            |
| -0.26 |       | -0.14 |       | 0.20  | Discoidin domain receptor family, member 2 (predicted)                |
| 0.30  |       | -0.29 | -0.29 |       | Dopamine receptor 1A                                                  |
|       |       |       | -0.28 |       | Dopamine receptor 2                                                   |
| -0.30 | 0.49  | 0.47  | -0.31 |       | Dopamine receptor 4                                                   |
| -0.22 |       |       | -0.22 |       | Endothelial differentiation, lysophosphatidic acid GPCR 4 (predicted) |
| 0.25  |       | 0.26  |       |       | Endothelial differentiation, lysophosphatidic acid GPCR 7 (predicted) |
|       |       | 0.36  |       |       | Endothelial differentiation, lysophosphatidic acid GPCR, 2            |
| 0.40  |       |       |       |       | Endothelial differentiation, sphingolipid GPCR, 8                     |
|       | 0.32  | 0.25  | -0.23 |       | Endothelin receptor type B                                            |
|       |       |       | -0.80 |       | Eph receptor A6 (predicted)                                           |

**Table 1 - Differentially Expressed Receptor List**

| 60    | 75    | 105   | 90    | 120   | Gene Name                                                           |
|-------|-------|-------|-------|-------|---------------------------------------------------------------------|
| 0.53  |       |       | -0.38 |       | Eph receptor A7                                                     |
| -0.60 |       |       |       | 0.31  | Eph receptor A8                                                     |
|       |       |       | -0.31 |       | Eph receptor B1                                                     |
|       |       | -0.90 |       |       | Epidermal growth factor receptor                                    |
| 0.39  |       |       | -0.26 |       | Epidermal growth factor receptor pathway substrate 15               |
| -0.39 |       |       |       |       | Epidermal growth factor receptor pathway substrate 8 (predicted)    |
|       |       | 0.18  | 0.17  |       | Erythropoietin receptor                                             |
|       |       | 0.32  |       |       | Estrogen receptor 1                                                 |
|       | 0.28  |       | -0.22 |       | Fc receptor, IgG, alpha chain transporter                           |
|       |       |       | -0.33 |       | Fc receptor, IgG, high affinity I                                   |
|       |       | 0.28  |       |       | Fc receptor, IgG, low affinity IIb                                  |
|       |       | -0.29 |       |       | FGF receptor activating protein 1                                   |
| -0.24 |       | -0.18 |       |       | Fibroblast growth factor receptor 3                                 |
| -0.39 |       | -0.31 |       | -0.37 | Fibroblast growth factor receptor 4                                 |
|       |       | -0.27 |       |       | Fibroblast growth factor receptor substrate 2 (predicted)           |
|       |       |       | -0.58 |       | Fibroblast growth factor receptor substrate 3                       |
| -0.21 |       |       |       | -0.23 | Fibroblast growth factor receptor-like 1                            |
|       |       |       | -0.23 |       | Folate receptor 2 (fetal) (predicted)                               |
| -0.16 |       | -0.15 |       | 0.20  | G protein-coupled receptor 107 (predicted)                          |
| -0.34 |       | -0.27 |       |       | G protein-coupled receptor 116                                      |
|       |       | -0.27 | -0.40 |       | G protein-coupled receptor 125 (predicted)                          |
|       | -0.61 | -0.22 |       |       | G protein-coupled receptor 149                                      |
|       |       |       | -0.58 |       | G protein-coupled receptor 151                                      |
|       |       |       |       | -0.31 | G protein-coupled receptor 155 (predicted)                          |
|       |       | 0.29  | -0.39 |       | G protein-coupled receptor 19                                       |
| 0.37  | 0.21  |       |       |       | G protein-coupled receptor 27                                       |
| -0.35 |       |       | -0.35 |       | G protein-coupled receptor 37                                       |
|       |       | -0.22 |       | -0.15 | G protein-coupled receptor 4                                        |
| 0.33  |       |       | 0.37  |       | G protein-coupled receptor 43                                       |
|       |       | -0.26 | -0.22 |       | G protein-coupled receptor 48                                       |
| -0.36 | -0.30 |       |       | 0.19  | G protein-coupled receptor 56                                       |
|       |       |       | 0.32  |       | G protein-coupled receptor 64                                       |
|       |       | 0.35  |       |       | G protein-coupled receptor 85                                       |
|       |       | 0.37  | -0.21 |       | G protein-coupled receptor, family C, group 5, member B (predicted) |
|       |       |       | 0.25  |       | G protein-coupled receptor, family C, group 5, member B (predicted) |
| 0.64  |       |       |       |       | G protein-coupled receptor, family C, group 5, member C             |
|       |       | -0.22 |       |       | Galanin receptor 2                                                  |
|       |       |       |       | -0.50 | Gamma-aminobutyric acid (GABA) B receptor 1                         |
| -0.31 |       |       | -0.41 | 0.33  | Gamma-aminobutyric acid A receptor, alpha 5                         |
| 0.31  |       | -0.18 |       |       | Glial cell line derived neurotrophic factor family receptor alpha 1 |
|       |       | -0.20 |       |       | Glial cell line derived neurotrophic factor family receptor alpha 2 |
| -0.17 |       |       | -0.16 |       | Glial cell line derived neurotrophic factor family receptor alpha 4 |
| -0.29 |       | -0.30 | -0.24 | -0.24 | Glucagon receptor                                                   |
| 0.28  |       |       |       |       | Glutamate receptor, ionotropic, 2                                   |
| 0.36  |       | -0.23 |       |       | Glutamate receptor, ionotropic, AMPA1 (alpha 1)                     |
| 0.24  |       | 0.43  | 0.45  | 0.50  | Glutamate receptor, ionotropic, AMPA3 (alpha 3)                     |
| 0.27  |       |       | -0.29 |       | Glutamate receptor, ionotropic, kainate 1                           |
| 0.30  |       | -0.21 |       |       | Glutamate receptor, ionotropic, kainate 2                           |
|       |       | 0.46  |       |       | Glutamate receptor, ionotropic, kainate 4                           |
|       |       | -0.17 | 0.14  |       | Glutamate receptor, ionotropic, kainate 5                           |
| 0.18  |       |       | -0.37 |       | Glutamate receptor, ionotropic, NMDA2C                              |
|       |       | 0.50  |       |       | Glutamate receptor, ionotropic, NMDA2D                              |
| 0.52  |       | -0.66 |       |       | Glutamate receptor, ionotropic, N-methyl D-aspartate 1              |
| 0.43  |       | -0.26 |       |       | Glutamate receptor, ionotropic, N-methyl D-aspartate 2A             |
| 0.22  |       |       |       |       | Glutamate receptor, ionotropic, N-methyl D-aspartate-like 1A        |
| 0.39  |       | -0.45 |       | 0.33  | Glutamate receptor, ionotropic, N-methyl-D-aspartate 3A             |

**Table 1 - Differentially Expressed Receptor List**

| 60    | 75    | 105   | 90    | 120   | Gene Name                                                           |
|-------|-------|-------|-------|-------|---------------------------------------------------------------------|
| -0.44 |       | -0.42 |       |       | Glutamate receptor, metabotropic 2                                  |
|       |       | 0.61  | 0.23  | 0.37  | Glutamate receptor, metabotropic 4                                  |
|       |       | -0.15 |       |       | G-protein coupled receptor 88                                       |
| -0.21 |       |       | -0.25 |       | G-protein-coupled receptor GPR34                                    |
|       |       |       | -0.21 |       | Granulocyte-macrophage colony stimulating receptor alpha            |
|       |       | 0.78  |       |       | Growth factor receptor bound protein 2                              |
|       |       | 0.21  | 0.32  |       | Growth factor receptor bound protein 7                              |
|       |       | 0.19  | 0.23  |       | Growth hormone receptor                                             |
|       |       | -0.41 | -0.63 |       | Histamine receptor H3                                               |
|       | -0.24 | -0.38 | -0.32 |       | Hypocretin (orexin) receptor 1                                      |
|       |       | 0.21  |       |       | Insulin-like growth factor 1 receptor                               |
|       |       | -0.26 | 0.12  |       | Integrin beta 1 (fibronectin receptor beta)                         |
| 0.26  |       |       |       |       | Interferon gamma receptor 1                                         |
|       |       |       | 0.29  |       | Interferon gamma receptor 2 (predicted)                             |
| 0.21  |       |       | -0.32 |       | Interleukin 1 receptor accessory protein                            |
| -0.14 |       | 0.14  |       | -0.22 | Interleukin 1 receptor antagonist                                   |
|       |       | -0.19 |       | -0.31 | Interleukin 1 receptor, type II                                     |
|       |       | -0.15 |       |       | Interleukin 1 receptor-like 1                                       |
| 1.27  |       | -0.27 | -0.42 |       | Interleukin 1 receptor-like 1 ligand                                |
|       | -0.36 |       |       |       | Interleukin 11 receptor, alpha chain 1                              |
|       |       | -0.39 | -0.21 |       | Interleukin 12 receptor, beta 2                                     |
|       |       | -0.30 |       |       | Interleukin 13 receptor, alpha 2                                    |
| -0.22 | 0.26  |       |       |       | Interleukin 17 receptor C (predicted)                               |
|       |       | -0.20 | -0.42 |       | Interleukin 2 receptor, $\gamma$ (severe combined immunodeficiency) |
|       |       |       | 0.33  |       | Interleukin 3 receptor, alpha chain                                 |
|       |       | -0.41 | 0.24  |       | KDEL endoplasmic reticulum protein retention receptor 1             |
|       |       | 0.40  | 0.42  |       | KDEL endoplasmic reticulum protein retention receptor 3             |
| 0.29  |       |       |       |       | Killer cell lectin-like receptor subfamily B, member 1A (mapped)    |
|       |       |       |       | -0.29 | Killer cell lectin-like receptor, family E, member 1                |
|       |       | -0.26 | 0.34  |       | Lamin B receptor                                                    |
| 0.26  |       | -0.33 |       |       | Leptin receptor                                                     |
| -0.29 |       | 0.22  |       |       | Leptin receptor overlapping transcript-like 1                       |
|       |       | 0.72  |       | 0.34  | Leukemia inhibitory factor receptor                                 |
| 0.30  |       |       |       |       | Leukocyte immunoglobulin-like receptor, subfamily B, member 3       |
|       |       | -0.57 |       |       | Leukocyte receptor cluster (LRC) member 8                           |
|       |       | -0.30 |       |       | Leukotriene B4 receptor                                             |
|       |       |       | 0.36  |       | Linker of T-cell receptor pathways                                  |
|       |       | -0.73 |       |       | Low density lipoprotein receptor                                    |
|       |       |       |       | 0.32  | Low density lipoprotein receptor-related protein 1                  |
|       | 0.27  | -0.38 |       |       | Low density lipoprotein receptor-related protein 11 (predicted)     |
|       | 0.20  | -0.18 |       |       | Low density lipoprotein receptor-related protein 3                  |
|       |       |       |       | -0.53 | Low density lipoprotein receptor-related protein 4                  |
| -0.34 |       | -0.37 |       |       | Low density lipoprotein receptor-related protein 6 (predicted)      |
| 0.24  |       | -0.26 | 0.28  | -0.19 | Luteinizing hormone/choriogonadotropin receptor                     |
|       |       | -0.41 |       |       | Macrophage inflammatory protein-1 alpha receptor gene               |
|       | -0.29 | -0.18 |       | -0.27 | Mammary tumor virus receptor 2                                      |
| 0.21  |       |       | 0.19  |       | Mannose receptor, C type 2 (predicted)                              |
| 0.65  |       | 0.54  |       |       | Natriuretic peptide receptor 1                                      |
|       |       | -0.29 |       |       | Natriuretic peptide receptor 2                                      |
|       |       | -0.35 | -0.18 | -0.22 | Natriuretic peptide receptor 3                                      |
|       |       | -0.29 |       |       | Natural cytotoxicity triggering receptor 3                          |
| 0.32  |       | 0.24  | -0.29 |       | Nerve growth factor receptor (TNFR superfamily, member 16)          |
| 0.32  |       | -0.67 |       |       | Neuromedin B receptor                                               |
| 0.23  |       |       |       |       | Neuronal pentraxin receptor                                         |
|       |       |       | 0.27  |       | NMDA receptor-regulated gene 1 (predicted)                          |
| 0.31  |       | 0.17  |       |       | Nuclear receptor binding factor 1                                   |



**Table 1 - Differentially Expressed Receptor List**

| 60    | 75    | 105   | 90    | 120   | Gene Name                                                                  |
|-------|-------|-------|-------|-------|----------------------------------------------------------------------------|
|       |       | -0.36 |       |       | Nuclear receptor binding SET domain protein 1 (predicted)                  |
|       |       |       |       | 0.30  | Nuclear receptor coactivator 1 (predicted)                                 |
|       | 0.24  |       |       |       | Nuclear receptor coactivator 2                                             |
|       |       |       |       | 0.48  | Nuclear receptor coactivator 3                                             |
|       |       |       | -0.28 |       | Nuclear receptor coactivator 4                                             |
|       |       | -0.25 | 0.29  |       | Nuclear receptor coactivator 5 (predicted)                                 |
| 0.30  |       |       |       |       | Nuclear receptor coactivator 6                                             |
| 0.28  |       |       | 0.39  |       | Nuclear receptor co-repressor 1                                            |
| -0.22 |       |       | -0.24 |       | Nuclear receptor subfamily 0, group B, member 2                            |
|       | -0.23 |       |       |       | Nuclear receptor subfamily 1, group D, member 1                            |
|       |       | 0.34  | 0.23  |       | Nuclear receptor subfamily 1, group D, member 2                            |
|       |       |       | 0.40  |       | Nuclear receptor subfamily 1, group H, member 2                            |
|       |       | -0.48 |       |       | Nuclear receptor subfamily 1, group H, member 3                            |
|       |       |       | -0.34 |       | Nuclear receptor subfamily 1, group H, member 4                            |
|       |       | -0.44 |       | -0.32 | Nuclear receptor subfamily 2, group F, member 2                            |
|       |       | -0.24 |       |       | Nuclear receptor subfamily 2, group F, member 6                            |
|       |       |       |       | 0.19  | Nuclear receptor subfamily 3, group C, member 1                            |
|       | 0.39  | 0.32  |       |       | Nuclear receptor subfamily 4, group A, member 1                            |
| -0.39 |       |       |       |       | Nuclear receptor subfamily 4, group A, member 2                            |
| 0.29  |       |       | -0.29 |       | Nuclear receptor subfamily 4, group A, member 3                            |
|       |       | -0.36 |       |       | Nuclear receptor subfamily 5, group A, member 2                            |
|       |       |       | 0.28  |       | Olfactory receptor 1280                                                    |
|       | 0.24  |       | -0.21 |       | Oncostatin M specific receptor                                             |
|       |       | -0.18 |       |       | Opioid growth factor receptor                                              |
| 0.29  |       | -0.24 | 0.45  |       | Opioid receptor, sigma 1                                                   |
|       | 0.25  | 0.27  |       |       | Opioid receptor-like                                                       |
| -0.24 |       |       |       |       | Oxidized low density lipoprotein (lectin-like) receptor 1                  |
|       |       | -0.19 | -0.20 |       | Parathyroid hormone receptor 1                                             |
|       |       | 0.33  | 0.25  |       | Peroxisome proliferative activated receptor $\gamma$ coactivator-related 1 |
|       |       | -0.43 | -0.16 |       | Peroxisome proliferator activated receptor alpha                           |
| 0.19  |       |       |       |       | Peroxisome proliferator activated receptor delta                           |
| 0.27  |       |       |       |       | Peroxisome proliferator activated receptor, gamma                          |
|       |       |       |       | 0.33  | Platelet derived growth factor receptor, alpha polypeptide                 |
| -0.22 |       | 0.23  |       | 0.20  | Platelet-activating factor receptor                                        |
|       |       |       | 0.27  |       | Poliovirus receptor-related 2 (herpesvirus entry mediator B)               |
| 0.76  |       |       |       |       | Poliovirus receptor-related 3 (predicted)                                  |
| -0.29 |       | 0.33  | 0.26  |       | Pre T-cell antigen receptor alpha                                          |
|       |       | 0.66  |       |       | Progesterone receptor membrane component 1                                 |
|       |       | 0.29  |       |       | Prolactin receptor                                                         |
|       |       |       | 0.33  |       | Prostaglandin E receptor 1                                                 |
| 0.17  |       |       |       |       | Prostaglandin E receptor 1                                                 |
|       |       |       | -0.38 |       | Prostaglandin E receptor 2, subtype EP2                                    |
|       |       | -0.22 |       |       | Prostaglandin F receptor                                                   |
| -0.29 |       |       |       |       | Prostaglandin F2 receptor negative regulator                               |
| -0.35 | -0.21 |       |       |       | Protein C receptor, endothelial                                            |
|       |       |       |       | -0.30 | Purinergic receptor P2X, ligand-gated ion channel 4                        |
|       | -0.19 | -0.23 | 0.28  |       | Purinergic receptor P2X, ligand-gated ion channel, 1                       |
|       |       | -0.41 | 0.25  |       | Purinergic receptor P2X, ligand-gated ion channel, 2                       |
|       |       | 0.27  |       |       | Purinergic receptor P2X, ligand-gated ion channel, 3                       |
| -0.20 |       |       |       |       | Purinergic receptor P2X-like 1, orphan receptor                            |
| 0.30  |       | 0.22  |       |       | Purinergic receptor P2Y, G-protein coupled 2                               |
|       |       | -0.16 |       |       | Pyrimidinergic receptor P2Y, G-protein coupled, 6                          |
|       |       | -0.50 |       |       | RAR-related orphan receptor alpha (predicted)                              |
| -0.24 |       |       | 0.18  |       | Reticulon 4 receptor                                                       |
|       |       |       | 0.20  |       | Reticulon 4 receptor-like 2                                                |
|       |       | 0.38  |       |       | Retinoic acid receptor, alpha                                              |

**Table 1 - Differentially Expressed Receptor List**

| 60    | 75    | 105   | 90    | 120   | Gene Name                                                          |
|-------|-------|-------|-------|-------|--------------------------------------------------------------------|
|       |       | -0.35 |       |       | Retinoid X receptor beta                                           |
|       |       | -0.35 |       |       | Ryanodine receptor 1, skeletal muscle                              |
|       |       | -0.17 | -0.23 |       | Ryanodine receptor 1, skeletal muscle                              |
|       |       | 0.28  |       |       | Ryanodine receptor 1, skeletal muscle                              |
| 0.34  |       |       |       |       | Scavenger receptor class B, member 1                               |
|       |       |       | 0.28  |       | Signal sequence receptor 4                                         |
|       |       |       |       | 0.38  | Signal sequence receptor, alpha                                    |
|       |       | 0.17  | -0.28 | -0.49 | Sortilin-related VPS10 domain containing receptor 3 (predicted)    |
|       | 0.58  | -0.25 | 0.23  |       | Steroid receptor RNA activator 1                                   |
| 0.52  |       |       |       | -0.31 | Tachykinin receptor 1                                              |
| -0.18 |       | -0.28 |       |       | Tachykinin receptor 3                                              |
|       |       |       | 0.63  |       | T-cell receptor beta chain                                         |
| -0.26 |       | 0.14  | -0.28 |       | Thymic stromal-derived lymphopoietin, receptor                     |
| 0.51  |       |       |       | -0.49 | Thyroid hormone receptor beta                                      |
| 0.25  |       | -0.31 | -0.15 |       | Toll-like receptor 2                                               |
|       |       | -0.41 | 0.53  |       | Toll-like receptor 3                                               |
| -0.29 |       | -0.25 |       |       | Toll-like receptor 4                                               |
| 0.48  |       | -0.43 |       |       | Toll-like receptor 6                                               |
|       |       |       | -0.36 |       | Toll-like receptor adaptor molecule 2 (predicted)                  |
| 0.27  |       |       |       |       | Transforming growth factor, beta receptor II                       |
|       |       |       | -0.22 |       | Transient receptor potential cation channel, subfamily C, member 2 |
| -0.26 |       | -0.12 |       |       | Transient receptor potential cation channel, subfamily C, member 3 |
|       |       | -0.32 |       |       | Transient receptor potential cation channel, subfamily C, member 4 |
|       |       |       | -0.34 |       | Transient receptor potential cation channel, subfamily C, member 7 |
|       |       | -0.23 |       |       | Transient receptor potential cation channel, subfamily M, member 3 |
| 0.27  |       |       |       |       | Transient receptor potential cation channel, subfamily V, member 1 |
| -0.17 |       | -0.31 | 0.27  |       | Triggering receptor expressed on myeloid cells 2 (predicted)       |
| 0.27  |       | -0.31 | 0.38  |       | Tumor necrosis factor receptor superfamily, member 19-like         |
| -0.24 |       |       |       |       | Tumor necrosis factor receptor superfamily, member 1a              |
|       |       | 0.30  |       | 0.38  | Tumor necrosis factor receptor superfamily, member 1b              |
| -0.15 |       | -0.22 |       |       | Tumor necrosis factor receptor superfamily, member 4               |
|       | 0.37  |       | -0.56 |       | Tumor necrosis factor receptor superfamily, member 5               |
| 0.39  |       |       | 0.43  |       | Type 1 TNF receptor shedding aminopeptidase regulator              |
|       | -0.26 |       |       |       | Very low density lipoprotein receptor                              |
|       |       | 0.32  | -0.25 |       | Xenotropic and polytropic retrovirus receptor 1 (predicted)        |

**Table 2 - Differentially Expressed Calcium and Potassium Channels**

| 60    | 75    | 90    | 105   | 120   | Gene Name                                                                            | Comment       |
|-------|-------|-------|-------|-------|--------------------------------------------------------------------------------------|---------------|
|       |       | 0.25  |       |       | Calcium channel, voltage-dependent, alpha2/delta subunit 1                           |               |
| -0.33 | -0.39 |       |       | -0.27 | Calcium channel, voltage-dependent, beta 1 subunit                                   |               |
| 0.26  |       |       | 0.29  |       | Calcium channel, voltage-dependent, beta 2 subunit                                   |               |
|       |       | 0.61  |       |       | Calcium channel, voltage-dependent, beta 3 subunit                                   |               |
|       |       | -0.19 |       |       | Calcium channel, voltage-dependent, beta 3 subunit                                   |               |
|       |       |       | -0.24 |       | Calcium channel, voltage-dependent, gamma subunit 1                                  |               |
|       |       | -0.37 |       |       | Calcium channel, voltage-dependent, gamma subunit 2                                  |               |
| 0.53  |       |       | -0.59 |       | Calcium channel, voltage-dependent, gamma subunit 4                                  |               |
| 0.26  | 0.39  |       | -0.31 | 0.33  | Calcium channel, voltage-dependent, L type, alpha 1D subunit                         | L type        |
| 0.29  | 0.37  |       |       |       | Calcium channel, voltage-dependent, P/Q type, alpha 1A subunit                       | P/Q Type      |
|       |       | -0.10 | -0.20 |       | Calcium channel, voltage-dependent, T type, alpha 1G subunit                         | T type        |
|       | 0.30  | 0.57  | 0.21  | 0.43  | Calcium channel, voltage-dependent, T type, alpha 1H subunit                         | T type        |
| -0.21 | -0.27 |       |       |       | K+ voltage-gated channel, subfamily S, 1                                             | KV9.1         |
|       |       |       | -0.25 |       | Potassium channel regulator 1                                                        | ?             |
| 0.44  |       |       |       |       | Potassium channel tetramerisation domain containing 13                               | ?             |
|       |       |       | -0.45 |       | Potassium channel tetramerization domain containing 10                               | ?             |
|       |       |       |       | -0.29 | Potassium channel, subfamily K, member 1                                             | LEAK          |
|       |       |       |       | -0.39 | Potassium channel, subfamily K, member 12                                            | LEAK          |
| 0.25  |       |       |       |       | Potassium channel, subfamily K, member 15                                            | LEAK          |
|       |       | -0.16 | -0.18 |       | Potassium channel, subfamily K, member 2                                             | LEAK          |
|       |       | -0.29 |       |       | Potassium channel, subfamily V, member 1                                             | LEAK          |
|       |       | -0.22 |       |       | Potassium intermediate/small conductance Ca-activated channel, subfamily N, member 3 |               |
|       |       | -0.16 |       | 0.18  | Potassium inwardly rectifying channel, subfamily J, member 11                        | KIR6.2        |
| 0.56  |       | 0.22  | -0.22 | -0.25 | Potassium inwardly-rectifying channel, subfamily J, member 12                        | Kir2.1        |
| 0.74  |       |       |       |       | Potassium inwardly-rectifying channel, subfamily J, member 16                        | KIR5.1        |
|       | 0.19  |       |       |       | Potassium inwardly-rectifying channel, subfamily J, member 6                         | Kir3.2        |
|       |       |       | -0.48 |       | Potassium inwardly-rectifying channel, subfamily J, member 6                         | Kir3.2        |
|       |       |       | 0.39  |       | Potassium large conductance calcium-activated channel, subfamily M, alpha member 1   | KCa1.1        |
|       |       | 0.23  |       |       | Potassium large conductance calcium-activated channel, subfamily M, beta member 4    |               |
|       |       | 0.28  | -0.68 | -0.58 | Potassium voltage gated channel, Shab-related subfamily, member 1                    | Kv2.1         |
|       | 0.32  | -0.24 |       |       | Potassium voltage gated channel, Shal-related family, member 2                       | Kv4.2         |
|       | -0.49 |       | -0.34 |       | Potassium voltage gated channel, Shal-related family, member 3                       | Kv4.3M,Kv4.3L |
|       |       |       | 0.18  |       | Potassium voltage gated channel, Shaw-related subfamily, member 1                    | KV3.1         |
| 0.42  |       |       |       |       | Potassium voltage gated channel, Shaw-related subfamily, member 2                    | Kv3.2         |
|       |       | 0.48  |       |       | Potassium voltage-gated channel, delayed-rectifier, subfamily S, member 3            | Kv9.3         |
| 0.33  |       | -0.28 | 0.23  |       | Potassium voltage-gated channel, shaker-related subfamily, beta member 2             | KCa2.3        |
|       |       |       | -0.47 |       | Potassium voltage-gated channel, shaker-related subfamily, member 1                  | Kv1.1         |
|       |       |       | 0.57  |       | Potassium voltage-gated channel, shaker-related subfamily, member 4                  | Kv1.4         |
|       |       |       |       | 0.55  | Potassium voltage-gated channel, subfamily G, member 3                               | Kv10.1, Kv6.3 |
|       |       | -0.26 |       |       | Potassium voltage-gated channel, subfamily H (eag-related), member 1                 | Kv10.1        |
|       | -0.20 |       | -0.16 |       | Potassium voltage-gated channel, subfamily H (eag-related), member 2                 | Kv11.1        |
|       | -0.25 | -0.36 |       |       | Potassium voltage-gated channel, subfamily H (eag-related), member 6                 | Kv11.2        |
| 1.12  |       | 1.12  |       |       | Potassium voltage-gated channel, subfamily Q, member 5                               | KV7.2         |

**Table 6 - cAMP/PKA Pathway**

| 60     | 75     | 90     | 105    | 120    | Component    | Gene Name                                                              |
|--------|--------|--------|--------|--------|--------------|------------------------------------------------------------------------|
|        |        | 0.267  |        |        | Gs $\alpha$  | Similar to Guanine nucleotide-binding protein G(olf), $\alpha$ subunit |
|        | 0.356  |        |        | -0.451 | cAMP cyclase | Adenylate cyclase 9 (predicted)                                        |
|        |        | -0.268 | -0.323 |        | cAMP cyclase | Adenylyl cyclase 8                                                     |
|        |        |        | -0.189 | -0.242 | cAMP cyclase | Adenylate cyclase 3                                                    |
| 0.184  |        |        |        |        | cAMP cyclase | Adenylate cyclase 5                                                    |
|        |        | -0.202 | -0.174 |        | cAMP cyclase | Adenylate cyclase 4                                                    |
| 0.414  | -0.403 | -0.258 | -0.383 |        | PKA          | Protein kinase, cAMP dependent regulatory, type I, alpha               |
| 0.282  |        | -0.273 | -0.267 |        | PKA          | Protein kinase, cAMP-dependent, regulatory, type 2, alpha              |
|        |        |        | -0.525 |        | PKA          | Protein kinase, cAMP dependent regulatory, type I, beta                |
|        |        |        | -0.331 |        | PKA          | Sperm autoantigenic protein 17                                         |
|        |        | -0.520 |        |        | PKA          | Protein kinase, cAMP dependent regulatory, type II beta                |
| 0.249  |        |        | -0.198 |        | CREB         | CAMP responsive element binding protein 1                              |
|        |        | 0.395  |        |        | CREB         | CAMP responsive element modulator                                      |
|        |        | 0.274  |        |        | CREB         | Hypothetical gene supported by NM_133381                               |
| -0.532 |        | -0.988 | 1.094  |        | CREB         | CAMP responsive element binding protein 3-like 4                       |
|        |        | 0.575  | -0.248 |        | CREB         | Glucosidase beta 2                                                     |
| 0.316  |        | -0.461 | 0.606  |        | CREB         | CAMP responsive element binding protein 3-like 1                       |
|        |        | -0.343 |        | -0.415 | CREB         | CAMP responsive element binding protein 3-like 2                       |
| -0.220 |        | 0.162  |        |        | CREB         | CAMP responsive element binding protein 3-like 3                       |
| 0.291  | 0.365  |        |        |        | Ca2+ channel | Calcium channel, voltage-dependent, P/Q type, $\alpha$ 1A subunit      |
| -0.332 | -0.390 |        |        | -0.268 | Ca2+ channel | Calcium channel, voltage-dependent, $\beta$ 1 subunit                  |
| 0.258  |        |        | 0.292  |        | Ca2+ channel | Calcium channel, voltage-dependent, $\beta$ 2 subunit                  |
|        |        | -0.185 |        |        | Ca2+ channel | Calcium channel, voltage-dependent, $\beta$ 3 subunit                  |
|        |        | 0.247  |        |        | Ca2+ channel | Calcium channel, voltage-dependent, $\alpha$ 2/ $\delta$ subunit 1     |
| 0.262  | 0.387  |        | -0.314 | 0.328  | Ca2+ channel | Calcium channel, voltage-dependent, L type, $\alpha$ 1D subunit        |

**Table 7 - PI3K Pathway**

| 60     | 75     | 90     | 105    | 120    | Component  | Gene Name                                                                                 |
|--------|--------|--------|--------|--------|------------|-------------------------------------------------------------------------------------------|
|        |        | 0.931  |        |        | PI3 Kinase | Phosphatidylinositol 3-kinase catalytic delta polypeptide (predicted)                     |
|        |        | 0.427  |        |        | PI3 Kinase | Phosphatidylinositol 3-kinase, regulatory subunit, polypeptide 2                          |
|        |        |        | -0.283 | -0.297 | PI3 Kinase | Phosphatidylinositol 3-kinase, regulatory subunit, polypeptide 1                          |
|        |        | 0.158  |        |        | PI3 Kinase | Phosphoinositide-3-kinase, class 2, beta polypeptide (predicted)                          |
|        |        | 0.294  |        |        | PI3 Kinase | Phosphoinositide-3-kinase, class 3                                                        |
|        | 0.275  |        | -0.154 |        | PI3K       | Phosphatidylinositol 4-kinase, catalytic, beta polypeptide                                |
| 0.435  |        |        |        |        | PI3K       | Ataxia telangiectasia mutated homolog (human) (mapped)                                    |
| 0.265  |        |        |        |        | PI3K       | Similar to Expressed sequence BB220380                                                    |
|        |        | 0.229  |        | 0.435  | PTEN       | Phosphatase and tensin homolog                                                            |
| -0.238 |        | 0.166  | 0.273  | 0.186  | PKB        | Thymoma viral proto-oncogene 2                                                            |
|        | 0.237  | 0.246  |        |        | PKB        | Thymoma viral proto-oncogene 1                                                            |
| 0.294  |        | -0.562 |        |        | eNOS       | Nitric oxide synthase 1, neuronal                                                         |
| 0.281  |        |        |        | 0.320  | eNOS       | Nitric oxide synthase 3, endothelial cell                                                 |
|        |        | -0.666 |        |        | Cdc42      | Cell division cycle 42 homolog (S. cerevisiae)                                            |
|        |        | 0.400  |        |        | Cdc42      | Similar to Phosphatidylinositol glycan, class F                                           |
|        |        | 0.299  |        |        | Cdc42      | Ras homolog gene family, member J                                                         |
|        |        | 0.307  |        |        | Cdc42      | Ras-related C3 botulinum toxin substrate 1                                                |
|        |        |        | 0.263  |        | Cdc42      | RAS-related C3 botulinum substrate 2                                                      |
|        |        |        |        | 0.409  | JNK1/2     | Mitogen-activated protein kinase 8                                                        |
| -0.177 |        |        |        |        | JNK1/2     | Mitogen activated protein kinase 10                                                       |
| -0.672 |        | 0.446  |        |        | jun        | Jun oncogene                                                                              |
|        | -0.301 | -0.188 |        |        | GSK-3β     | Glycogen synthase kinase 3 alpha                                                          |
|        |        |        | 0.498  |        | Mdm2       | Transformed mouse 3T3 cell double minute 4                                                |
|        |        |        | -0.380 |        | Mdm2       | Transformed mouse 3T3 cell double minute 2 (predicted)                                    |
|        |        |        | -0.337 |        | Tsc2       | Tuberous sclerosis 2                                                                      |
| 0.342  | 0.216  |        | -0.216 |        | FKHRL1     | Forkhead box P1                                                                           |
| -0.450 |        | 0.367  | 0.523  |        | FKHRL1     | Forkhead box D3                                                                           |
|        | 0.342  | 0.478  | -0.299 |        | FKHRL1     | Checkpoint suppressor 1 (predicted)                                                       |
|        | 0.269  |        | -0.347 |        | FKHRL1     | Similar to Fas apoptotic inhibitory molecule 1 (rFAIM)                                    |
|        |        | -0.378 | -0.306 |        | FKHRL1     | Similar to ribosomal protein S27a                                                         |
|        |        | 0.179  |        |        | FKHRL1     | Fas apoptotic inhibitory molecule                                                         |
|        |        | -0.307 | 0.400  |        | FKHRL1     | Forkhead box G1                                                                           |
|        |        |        | -0.271 |        | FKHRL1     | Forkhead box K2 (predicted)                                                               |
|        |        | 0.538  |        |        | FKHRL1     | Forkhead box O3 (predicted)                                                               |
|        |        | -0.537 |        |        | FKHRL1     | Forkhead box M1                                                                           |
|        |        |        | 0.359  |        | FKHRL1     | Forkhead box O1A                                                                          |
|        |        |        |        |        | FKHRL1     | Serine/cysteine proteinase inhibitor, clade A (α-1 antiproteinase, antitrypsin), member 1 |
|        |        | -0.193 |        |        | FKHRL1     | member 1                                                                                  |
|        |        |        | 0.653  |        | NFKB       | Similar to nuclear factor kappa B subunit p100                                            |
|        |        | -0.393 |        |        | NFKB       | nuclear factor of kappa light chain gene enhancer in B-cells inhibitor, β                 |
|        |        |        | -0.716 |        | NFKB       | nuclear factor of kappa light chain gene enhancer in B-cells inhibitor, α                 |
|        |        | 0.371  | -0.310 |        | NFKB       | B-cell leukemia/lymphoma 3 (predicted)                                                    |

**Table 8 - PKC Pathway**

| 60     | 75     | 90     | 105    | 120    | Component                | Gene Name                                                              |
|--------|--------|--------|--------|--------|--------------------------|------------------------------------------------------------------------|
| -0.238 | 0.236  | 0.247  |        |        | G <sub>q</sub> α         | Guanine nucleotide binding protein, alpha 11                           |
|        |        | 0.410  |        |        | G <sub>q</sub> α         | Guanine nucleotide binding protein, alpha q polypeptide                |
|        |        | -0.150 |        |        | PLC                      | Phospholipase C, beta 3                                                |
|        |        |        | -0.196 |        | PLC                      | Phospholipase C, beta 4                                                |
| -0.310 |        |        |        | -0.549 | PLCβ <sub>γ</sub>        | Phospholipase C, epsilon 1                                             |
|        |        | -0.453 |        |        | PLCβ <sub>γ</sub>        | Phospholipase C, delta 1                                               |
| 0.436  |        | 0.152  |        |        | PLCβ <sub>γ</sub>        | Phospholipase C, delta 4                                               |
|        | 0.176  |        |        |        | PLCβ <sub>γ</sub>        | Phospholipase C-like 2 (predicted)                                     |
|        | -0.183 | -0.286 |        |        | PKC                      | Protein kinase C, beta 1                                               |
| -0.324 |        | -0.265 |        |        | PKC                      | Protein kinase C, eta                                                  |
|        |        |        | -0.479 |        | PKC                      | Protein kinase C, zeta                                                 |
| -0.323 |        |        |        |        | PKC                      | Protein kinase C, epsilon                                              |
| 0.262  |        | -0.289 |        |        | PKC                      | Protein kinase C, delta                                                |
|        |        | 0.255  |        |        | PKC                      | Protein kinase C, gamma                                                |
|        |        |        | -0.339 |        | CaMKII                   | Calcium/calmodulin-dependent protein kinase II gamma                   |
|        |        | 0.445  |        |        | CaMKII                   | Calcium/calmodulin-dependent protein kinase II, delta                  |
|        |        | 0.871  | 0.583  | 0.866  | CaMK                     | Double cortin and Ca <sup>2+</sup> /calmodulin-dependent kinase-like 1 |
|        |        |        | -0.373 |        | CaMK                     | P55 protein                                                            |
|        |        | -0.206 | 0.267  |        | Calmodulin               | Calmodulin 2                                                           |
|        |        | 0.303  |        |        | Calmodulin               | Calmodulin 3                                                           |
| -0.332 | -0.390 |        |        | -0.268 | Ca <sup>2+</sup> channel | Calcium channel, voltage-dependent, beta 1 subunit                     |
|        |        | -0.185 |        |        | Ca <sup>2+</sup> channel | Calcium channel, voltage-dependent, beta 3 subunit                     |
| 0.291  | 0.365  |        |        |        | Ca <sup>2+</sup> channel | Calcium channel, voltage-dependent, P/Q type, α1A subunit              |
| 0.258  |        |        | 0.292  |        | Ca <sup>2+</sup> channel | Calcium channel, voltage-dependent, beta 2 subunit                     |
|        |        | 0.247  |        |        | Ca <sup>2+</sup> channel | Calcium channel, voltage-dependent, α2/δ subunit 1                     |
| 0.262  | 0.387  |        | -0.314 | 0.328  | Ca <sup>2+</sup> channel | Calcium channel, voltage-dependent, L type, α1D subunit                |
|        |        |        | -0.476 |        | GIRK                     | Potassium inwardly-rectifying channel, subfamily J, member 6           |
|        | 0.290  |        | 0.418  |        | Fyn kinase               | SH3-domain binding protein 4                                           |
|        |        | 0.215  | 0.324  |        | Fyn kinase               | Yamaguchi sarcoma viral (v-yes-1) oncogene homolog                     |
|        |        | 0.456  |        |        | Fyn kinase               | Rous sarcoma oncogene                                                  |
| -0.408 |        |        |        |        | Fyn kinase               | Fyn proto-oncogene                                                     |
|        |        | -0.348 | 0.494  | -0.378 | c-Fos                    | FBJ murine osteosarcoma viral oncogene homolog                         |
|        |        |        | -0.170 | -0.298 | SRF                      | Similar to serum response factor                                       |

**Table 9 - MAPK Pathway**

| 60     | 75     | 90     | 105    | 120   | Component  | Gene Name                                                    |
|--------|--------|--------|--------|-------|------------|--------------------------------------------------------------|
| 0.380  |        | 0.152  | 0.370  |       | Ras-GDP    | RAB8B, member RAS oncogene family                            |
|        |        | 1.032  | 0.663  |       | Ras-GDP    | RAB1, member RAS oncogene family                             |
|        |        | 0.335  |        |       | Ras-GDP    | RAB10, member RAS oncogene family                            |
|        |        | 0.585  |        |       | Ras-GDP    | RAB28, member RAS oncogene family                            |
|        |        | 0.418  |        |       | Ras-GDP    | Kirsten rat sarcoma viral oncogene homologue 2 (active)      |
|        |        | 0.419  |        |       | Ras-GDP    | Related RAS viral (r-ras) oncogene homologue 2               |
|        |        | 0.269  |        |       | Ras-GDP    | RAB13, member RAS oncogene family                            |
| 0.235  | 0.335  | -0.138 | -0.232 |       | Ras        | RAB25, member RAS oncogene family (predicted)                |
|        |        |        | 0.947  |       | Ras        | RAB11B, member RAS oncogene family                           |
|        |        |        | 0.224  |       | Ras        | RAB11a, member RAS oncogene family                           |
|        |        | 0.492  | -0.244 |       | Raf-1      | Properdin factor, complement (mapped)                        |
|        |        | -0.282 |        |       | Raf-1      | V-raf oncogene homolog 1 (murine sarcoma 3611 virus)         |
|        |        |        | 0.189  |       | Raf-1      | ELK1, member of ETS oncogene family                          |
|        |        | -0.385 | -0.254 |       | MEKK1-5    | Mitogen activated protein kinase kinase kinase 3 (predicted) |
| 0.205  |        | -0.129 |        |       | MEKK1-5    | Similar to Cerebral cavernous malformation 2 homolog         |
|        |        | -0.535 |        |       | MEKK       | Protein kinase, lysine deficient 1                           |
|        |        | 0.735  |        |       | MEK1-2     | Mitogen activated protein kinase kinase 1                    |
|        |        |        | -0.384 |       | MEK        | Mitogen activated protein kinase kinase 3                    |
|        |        |        | -0.360 |       | MEK        | Mitogen-activated protein kinase kinase 6                    |
|        | -0.320 | -0.370 | 0.298  |       | MAPKAPK2/3 | Mitogen-activated protein kinase-activated protein kinase 3  |
| 0.335  |        |        | -0.228 |       | MAPK       | Mitogen activated protein kinase 3                           |
| 0.641  |        | -0.247 | 0.205  |       | MAPK       | Mitogen-activated protein kinase 4                           |
|        | -0.224 | -0.214 | -0.125 |       | MAPK       | Mitogen-activated protein kinase 7                           |
| -0.177 |        |        |        |       | MAPK       | Mitogen H5activated protein kinase 10                        |
|        |        |        |        | 0.409 | MAPK       | Mitogen-activated protein kinase 8                           |
|        |        |        | 0.298  |       | MAPK       | Mitogen activated protein kinase 14                          |

**Table 10 - SNARE Pathway**

| 60    | 75     | 90     | 105    | 120    | Component     | Gene Name                                                    |
|-------|--------|--------|--------|--------|---------------|--------------------------------------------------------------|
|       |        | -0.445 |        |        | SNARE Complex | Vesicle-associated membrane protein 8                        |
|       |        |        | -0.506 |        | SNARE Complex | Vesicle-associated membrane protein 2                        |
|       |        |        | -0.332 | -0.383 | SNARE Complex | Vesicle-associated membrane protein 1                        |
|       |        | -0.283 |        |        | SNARE Complex | Synaptosomal-associated protein 29                           |
|       |        | -0.210 |        |        | SNARE Complex | Vesicle transport interacting w/ t-SNAREs homolog 1A (yeast) |
|       | -0.195 | -0.404 |        |        | SNARE Complex | Epimorphin                                                   |
|       | 0.261  | 0.300  |        |        | SNARE Complex | Syntaxin 4A (placental)                                      |
| 0.286 |        | 0.238  |        |        | SNARE Complex | Syntaxin 3                                                   |
|       |        | 0.604  |        |        | SNARE Complex | Syntaxin 12                                                  |



**Table 11 - Primers**

| <b>Gene Name</b> | <b>Forward Primer</b>  | <b>Reverse Primer</b>  |
|------------------|------------------------|------------------------|
| ADCY8            | TGCCAGAGTTGCTGTTCTCA   | CAACCCAACCCATTCATCTT   |
| ADMR             | CTGTGTGGCCCTCTTAGACA   | CTGGCTTGTTCAAGGGTCAAT  |
| ADRA2C           | TATCTCTCCTCCCCAGACA    | GAGCTCAGACAACTGCACCA   |
| AGTR1            | TGGACTTGGGTAACACTGCT   | TCAAGTTTCAGGACTCCTTTGT |
| CACNA1D          | TGCGCTACCCTTCCAGTTTA   | TCTGTGCAGCCGTTCTGA     |
| CACNA1H          | CCTCCCCTCAGCTTTGACTT   | CATCCATTCCAGGCTGTTG    |
| CNR1             | CAATGATGCTACCAGTTCAACA | TCGCCTAGAGAGGAAACCTT   |
| CRHR             | CGTCAGTGAGCTTGCATCAT   | CAGGACAAGCACTCCATCAG   |
| GABRA5           | ACCCAGGGTCCAGAAACAAT   | CGCCCCAACACCTTTACAAC   |
| GNA11            | CTTGAGGGACAGGGACAGAA   | CGTGAAGGACACCATCCTG    |
| HCRTR1           | ACAATGCCAACGAGATCCA    | ACATAGCCAGCTGCACCAAT   |
| HRH3             | AAAGCATTCTCCAGGTGT     | CCCCGTCTGTACAATCAGAA   |
| KCNA4            | CTGCTGGGCGCCTTATTT     | CAGCAGCCGAATCTTTCAA    |
| KRAS             | AAAGGGAAGCCATAAATCC    | CCATCCCTACTCTGTGTTCCA  |
| NPR1             | CGAGTCACACGCTCAATGAT   | ACCTGAGCTCCTGCGAATG    |
| NPR3             | CCCAATGTTGCTTTCTTCTTG  | CTTGCAAATCATGTGGCCTA   |
| P2RX2            | AGCATGCTGCAACTTCTAAAGG | CCATCTCCTTTCCCAACAGA   |
| PI3KR2           | AGTGCAATACCAGCTCCTTCA  | ATGGCGACACGAAGCACT     |
| PIK3CD           | CCACTTCATGACCCGACTG    | CCTGAGCTTAGCTGCTCCAA   |
| PKCRZ            | ATTCCTCAGGGCATTACACG   | CCCTACCAGAGGGTGAGACA   |
| PLCB4            | TTGAATTTAGCCTTCATGG    | AACCGGTAGCCTAGGAGTCA   |
| PLCD1            | CACAGCTCCACTCACTCAGG   | GCCATGTCCACCTCTTGTCT   |
| PLCE1            | TGCCTTTATTTCCAGCCAGA   | CGGCCGCCTACTTGAGTTAT   |
| PRKAR1A          | ATGGCAACAAGGCAGCTTTC   | CCTCCCTCCTTTCCAGTTA    |
| PRKCH            | TGCCTTTATTTCCAGCCAGA   | CGGCCGCCTACTTGAGTTAT   |
| RAB1A            | AACCAGTGTCTGTCAGTTTCCA | TCTGCAGCCACAAATTATATGC |
| RAB28            | AACATCAGGTACAGTGTGATCG | CTGATCCTCCACATGGAATTT  |
| RAB8A            | CCAGGAAAGATTCCGAACAA   | AGGCATGCTCTTCAATGTTTCT |
| STX12            | CACAGCAGCCAGATCCTCTA   | CTGCCCTTTTTACAGACCT    |
| STX3A            | AGGCCAAGATTTCAAGTGCAG  | TATCAGGGTCAGGCTCGAAA   |
| TACR1            | CTTGCCCTTCTCCAGGTATGC  | CCGTGAACATCCTCATGGTT   |
| VAMP2            | CTCCTACCCTTTCACACCACA  | GAAGTAGGACCCCAAAGTTGC  |

**Table 12 - qRT-PCR validation of Microarray Results**

| Minutes After Hypertensive Pulse | Gene    | P-Value | Log Fold Change | qRT-PCR Direction | Microarray Direction |
|----------------------------------|---------|---------|-----------------|-------------------|----------------------|
| 0                                | PRKAR1A | 0.015   | 0.73            | +                 | +                    |
| 0                                | CRHR    | 0.002   | 1.40            | +                 | +                    |
| 0                                | HCRTR1  | 0.046   | 0.79            | +                 | +                    |
| 0                                | TACR1   | 0.004   | 0.41            | +                 | +                    |
| 0                                | CACN1D  | < 0.001 | 2.78            | +                 | +                    |
| 0                                | GABRA5  | 0.014   | 0.86            | +                 | -                    |
| 0                                | PLCE1   | < 0.001 | 0.60            | +                 | -                    |
| 0                                | PRKCH   | < 0.001 | 0.90            | +                 | -                    |
| 30                               | ADCY8   | 0.001   | -2.30           | -                 | -                    |
| 30                               | PLCD1   | 0.005   | -2.12           | -                 | -                    |
| 30                               | HCRTR1  | 0.036   | -0.24           | -                 | -                    |
| 30                               | NPR1    | < 0.001 | -2.79           | -                 | -                    |
| 30                               | P2RX2   | 0.007   | -2.65           | -                 | -                    |
| 30                               | ADMR1   | 0.013   | -1.83           | -                 | -                    |
| 30                               | HRH3    | 0.011   | -2.58           | -                 | -                    |
| 30                               | GNA11   | 0.039   | -2.39           | -                 | +                    |
| 30                               | RAB1A   | 0.003   | -2.50           | -                 | +                    |
| 30                               | RAB28   | 0.037   | -1.67           | -                 | +                    |
| 30                               | KRAS    | 0.001   | -2.65           | -                 | +                    |
| 30                               | STX3    | 0.006   | -2.74           | -                 | +                    |
| 30                               | CNR1    | 0.004   | -2.27           | -                 | +                    |
| 30                               | CACNA1H | 0.041   | -2.23           | -                 | +                    |
| 30                               | STX12   | 0.094   | -1.74           |                   | +                    |
| 30                               | PI3KR2  | 0.108   | -1.41           |                   | +                    |
| 30                               | PIK3CD  | 0.058   | -2.01           |                   | +                    |
| 30                               | PRKCH   | 0.062   | -2.05           |                   | -                    |
| 30                               | PRKAR1A | 0.090   | -1.35           |                   | -                    |
| 30                               | NPR3    | 0.098   | 0.37            |                   | -                    |
| 45                               | ADCY8   | 0.009   | -3.33           | -                 | -                    |
| 45                               | PRKA1A  | < 0.001 | -3.91           | -                 | -                    |
| 45                               | PLCB4   | < 0.001 | -4.99           | -                 | -                    |
| 45                               | PKCRZ   | 0.008   | -3.45           | -                 | -                    |
| 45                               | VAMP2   | 0.005   | -7.90           | -                 | -                    |
| 45                               | ADRA2C  | 0.007   | -3.51           | -                 | -                    |
| 45                               | HCRTR1  | 0.025   | -3.99           | -                 | -                    |
| 45                               | AGTR1   | 0.004   | -3.19           | -                 | -                    |
| 45                               | GABRA5  | 0.001   | -3.55           | -                 | -                    |
| 45                               | HRH3    | 0.030   | -3.57           | -                 | -                    |
| 45                               | RAB1A   | 0.012   | -4.00           | -                 | +                    |
| 45                               | RAB8A   | < 0.001 | -4.32           | -                 | +                    |
| 45                               | CACNA1H | 0.042   | -4.12           | -                 | +                    |
| 45                               | KCNA4   | 0.001   | -3.62           | -                 | +                    |
